# Supplementary material for: Sc and Y bis(alkyl) complexes supported by bidentate and tridentate amidinate ligands. Synthesis, structure and catalytic activity in polymerization of isoprene and 1-heptene
Source: Royal Society of Chemistry journal article supplement (doi:10.1039/d2dt00866a), 2022-01-01
Supplement: d2dt00866a1.pdf [file d2dt00866a1.pdf]

# Bis(alkyl) Sc and Y complexes supported by bi- and tridentate amidinate ligands. Synthesis, structure and catalytic activity in polymerization of isoprene and 1-heptene.

Aleksei O. Tolpygin,<sup>a,b</sup> Anastasia A. Sachkova,<sup>c</sup> Alexander D. Mikhailychev,<sup>c</sup> Anatoly M.

Ob'edkov,<sup>a</sup> Tatyana A. Kovylyina,<sup>a</sup> Anton V. Cherkasov,<sup>a</sup> Georgy K. Fukin,<sup>a</sup> Alexander A. Trifonov<sup>\*a,b</sup>

<sup>a</sup>Institute of Organometallic Chemistry of Russian Academy of Sciences, Tropinina 49, GSP-445, 603950, Nizhny Novgorod, Russia. Fax: 007831 4627497

<sup>b</sup>Institute of Organoelement compounds of Russian Academy of Sciences, Vavilova str. 28, 119334, Moscow, Russia

<sup>c</sup>Lobachevsky State University of Nizhny Novgorod, Prospekt Gagarina 23, 603022, Nizhny Novgorod, Russia.

## Contents:

|                                                                                                                                                                                                                                                                                                                 |    |
|-----------------------------------------------------------------------------------------------------------------------------------------------------------------------------------------------------------------------------------------------------------------------------------------------------------------|----|
| Table 1S. Crystallographic data and structure refinement details for <b>1-4</b> .....                                                                                                                                                                                                                           | 3  |
| Figure S1. <sup>1</sup> H NMR spectrum (400 MHz, C <sub>6</sub> D <sub>6</sub> , 20 °C) of {(2,6-Me <sub>2</sub> C <sub>6</sub> H <sub>3</sub> )NC(tBu)N(2,6-Me <sub>2</sub> C <sub>6</sub> H <sub>3</sub> )}Y(CH <sub>2</sub> SiMe <sub>3</sub> ) <sub>2</sub> (THF) ( <b>1</b> ). .....                       | 5  |
| Figure S2. <sup>13</sup> C{ <sup>1</sup> H} NMR spectrum (100.62 MHz, C <sub>6</sub> D <sub>6</sub> , 20 °C) of {(2,6-Me <sub>2</sub> C <sub>6</sub> H <sub>3</sub> )NC(tBu)N(2,6-Me <sub>2</sub> C <sub>6</sub> H <sub>3</sub> )}Y(CH <sub>2</sub> SiMe <sub>3</sub> ) <sub>2</sub> (THF) ( <b>1</b> ). .....  | 6  |
| Figure S3. IR spectrum of {(2,6-Me <sub>2</sub> C <sub>6</sub> H <sub>3</sub> )NC(tBu)N(2,6-Me <sub>2</sub> C <sub>6</sub> H <sub>3</sub> )}Y(CH <sub>2</sub> SiMe <sub>3</sub> ) <sub>2</sub> (THF) ( <b>1</b> ). .....                                                                                        | 7  |
| Figure S4. <sup>1</sup> H NMR spectrum (400 MHz, C <sub>6</sub> D <sub>6</sub> , 20 °C) of {(2,6-Me <sub>2</sub> C <sub>6</sub> H <sub>3</sub> )NC(tBu)N(2,6-Me <sub>2</sub> C <sub>6</sub> H <sub>3</sub> )}Sc(CH <sub>2</sub> SiMe <sub>3</sub> ) <sub>2</sub> (THF) ( <b>2</b> ). .....                      | 8  |
| Figure S5. <sup>13</sup> C{ <sup>1</sup> H} NMR spectrum (100.62 MHz, C <sub>6</sub> D <sub>6</sub> , 20 °C) of {(2,6-Me <sub>2</sub> C <sub>6</sub> H <sub>3</sub> )NC(tBu)N(2,6-Me <sub>2</sub> C <sub>6</sub> H <sub>3</sub> )}Sc(CH <sub>2</sub> SiMe <sub>3</sub> ) <sub>2</sub> (THF) ( <b>2</b> ). ..... | 9  |
| Figure S6. IR spectrum of {(2,6-Me <sub>2</sub> C <sub>6</sub> H <sub>3</sub> )NC(tBu)N(2,6-Me <sub>2</sub> C <sub>6</sub> H <sub>3</sub> )}Sc(CH <sub>2</sub> SiMe <sub>3</sub> ) <sub>2</sub> (THF) ( <b>2</b> ). .....                                                                                       | 10 |
| Figure S7. <sup>1</sup> H NMR spectrum (400 MHz, C <sub>6</sub> D <sub>6</sub> , 20 °C) of {2-[Ph <sub>2</sub> P(O)]C <sub>6</sub> H <sub>4</sub> NC(tBu)N(2,6-Me <sub>2</sub> C <sub>6</sub> H <sub>3</sub> )}Sc(CH <sub>2</sub> SiMe <sub>3</sub> ) <sub>2</sub> ( <b>3</b> ).....                            | 11 |
| Figure S8. <sup>13</sup> C{ <sup>1</sup> H} NMR spectrum (100.62 MHz, C <sub>6</sub> D <sub>6</sub> , 20 °C) of {2-[Ph <sub>2</sub> P(O)]C <sub>6</sub> H <sub>4</sub> NC(tBu)N(2,6-Me <sub>2</sub> C <sub>6</sub> H <sub>3</sub> )}Sc(CH <sub>2</sub> SiMe <sub>3</sub> ) <sub>2</sub> ( <b>3</b> ).....       | 12 |
| Figure S9. <sup>31</sup> P{ <sup>1</sup> H} NMR spectrum (161.99 MHz, C <sub>6</sub> D <sub>6</sub> , 20 °C) of {2-[Ph <sub>2</sub> P(O)]C <sub>6</sub> H <sub>4</sub> NC(tBu)N(2,6-Me <sub>2</sub> C <sub>6</sub> H <sub>3</sub> )}Sc(CH <sub>2</sub> SiMe <sub>3</sub> ) <sub>2</sub> ( <b>3</b> ).....       | 13 |
| Figure S10. IR spectrum of {2-[Ph <sub>2</sub> P(O)]C <sub>6</sub> H <sub>4</sub> NC(tBu)N(2,6-Me <sub>2</sub> C <sub>6</sub> H <sub>3</sub> )}Sc(CH <sub>2</sub> SiMe <sub>3</sub> ) <sub>2</sub> ( <b>3</b> ). .....                                                                                          | 14 |
| Figure S11. <sup>1</sup> H NMR spectrum (400 MHz, C <sub>6</sub> D <sub>6</sub> , 20 °C) of {2-[Ph <sub>2</sub> P(NPh)]C <sub>6</sub> H <sub>4</sub> NC(tBu)N(2,6-Me <sub>2</sub> C <sub>6</sub> H <sub>3</sub> )}Sc(CH <sub>2</sub> SiMe <sub>3</sub> ) <sub>2</sub> ( <b>4</b> ).....                         | 15 |
| Figure S12. <sup>13</sup> C{ <sup>1</sup> H} NMR spectrum (100.62 MHz, C <sub>6</sub> D <sub>6</sub> , 20 °C) of {2-[Ph <sub>2</sub> P(NPh)]C <sub>6</sub> H <sub>4</sub> NC(tBu)N(2,6-Me <sub>2</sub> C <sub>6</sub> H <sub>3</sub> )}Sc(CH <sub>2</sub> SiMe <sub>3</sub> ) <sub>2</sub> ( <b>4</b> ).....    | 16 |

|                                                                                                                                                                                                                                                                                                      |    |
|------------------------------------------------------------------------------------------------------------------------------------------------------------------------------------------------------------------------------------------------------------------------------------------------------|----|
| Figure S13. $^{31}\text{P}\{^1\text{H}\}$ NMR spectrum (161.99 MHz, $\text{C}_6\text{D}_6$ , 20 °C) of $\{2\text{-}[\text{Ph}_2\text{P}(\text{NPh})]\text{C}_6\text{H}_4\text{NC}(\text{tBu})\text{N}(2,6\text{-Me}_2\text{C}_6\text{H}_3)\}\text{Sc}(\text{CH}_2\text{SiMe}_3)_2$ ( <b>4</b> )..... | 17 |
| Figure S14. IR spectrum of $\{2\text{-}[\text{Ph}_2\text{P}(\text{NPh})]\text{C}_6\text{H}_4\text{NC}(\text{tBu})\text{N}(2,6\text{-Me}_2\text{C}_6\text{H}_3)\}\text{Sc}(\text{CH}_2\text{SiMe}_3)_2$ ( <b>4</b> ). .....                                                                           | 18 |
| Figure S 15. GPC of PIP sample (Table 1, entry 1). .....                                                                                                                                                                                                                                             | 20 |
| Figure S 16. $^{13}\text{C}\{^1\text{H}\}$ NMR spectrum of PIP sample (Table 1, entry 1). .....                                                                                                                                                                                                      | 21 |
| Figure S 17. GPC of PIP sample (Table 1, entry 2). .....                                                                                                                                                                                                                                             | 23 |
| Figure S 18. $^{13}\text{C}\{^1\text{H}\}$ NMR spectrum of PIP sample (Table 1, entry 2). .....                                                                                                                                                                                                      | 24 |
| Figure S 19. GPC of PIP sample (Table 1, entry 5). .....                                                                                                                                                                                                                                             | 26 |
| Figure S 20. $^{13}\text{C}\{^1\text{H}\}$ NMR spectrum of PIP sample (Table 1, entry 5). .....                                                                                                                                                                                                      | 27 |
| Figure S 21. GPC of PIP sample (Table 1, entry 7). .....                                                                                                                                                                                                                                             | 29 |
| Figure S 22. $^{13}\text{C}\{^1\text{H}\}$ NMR spectrum of PIP sample (Table 1, entry 7). .....                                                                                                                                                                                                      | 30 |
| Figure S 23. GPC of PIP sample (Table 1, entry 8). .....                                                                                                                                                                                                                                             | 32 |
| Figure S 24. $^{13}\text{C}\{^1\text{H}\}$ NMR spectrum of PIP sample (Table 1, entry 8). .....                                                                                                                                                                                                      | 33 |
| Figure S 25. GPC of PIP sample (Table 1, entry 10). .....                                                                                                                                                                                                                                            | 35 |
| Figure S 26. $^{13}\text{C}\{^1\text{H}\}$ NMR spectrum of PIP sample (Table 1, entry 10). .....                                                                                                                                                                                                     | 36 |
| Figure S 27. GPC of PIP sample (Table 1, entry 11). .....                                                                                                                                                                                                                                            | 38 |
| Figure S 28. $^{13}\text{C}\{^1\text{H}\}$ NMR spectrum of PIP sample (Table 1, entry 11). .....                                                                                                                                                                                                     | 39 |
| Figure S 29. GPC of PIP sample (Table 1, entry 15). .....                                                                                                                                                                                                                                            | 41 |
| Figure S 30. $^{13}\text{C}\{^1\text{H}\}$ NMR spectrum of PIP sample (Table 1, entry 15). .....                                                                                                                                                                                                     | 42 |
| Figure S 31. GPC of PIP sample (Table 1, entry 16). .....                                                                                                                                                                                                                                            | 44 |
| Figure S 32. $^{13}\text{C}\{^1\text{H}\}$ NMR spectrum of PIP sample (Table 1, entry 16). .....                                                                                                                                                                                                     | 45 |
| Figure S 33. GPC of PIP sample (Table 1, entry 17). .....                                                                                                                                                                                                                                            | 47 |
| Figure S 34. $^{13}\text{C}\{^1\text{H}\}$ NMR spectrum of PIP sample (Table 1, entry 17). .....                                                                                                                                                                                                     | 48 |
| Figure S 35. GPC of polyheptene sample (Table 2, entry 2). .....                                                                                                                                                                                                                                     | 50 |
| Figure S 36. GPC of polyheptene sample (Table 2, entry 3). .....                                                                                                                                                                                                                                     | 52 |
| Figure S 37. GPC of polyheptene sample (Table 2, entry 4). .....                                                                                                                                                                                                                                     | 54 |
| Figure S 38. GPC of polyheptene sample (Table 2, entry 6). .....                                                                                                                                                                                                                                     | 56 |
| Figure S 39. GPC of polyheptene sample (Table 2, entry 8). .....                                                                                                                                                                                                                                     | 58 |

**Table 1S.** Crystallographic data and structure refinement details for **1-4**.

| Compound                                    | <b>1</b>                                                          | <b>2</b>                                                          | <b>3</b>                                                           | <b>4</b>                                                                                              |
|---------------------------------------------|-------------------------------------------------------------------|-------------------------------------------------------------------|--------------------------------------------------------------------|-------------------------------------------------------------------------------------------------------|
| Empirical formula                           | C <sub>33</sub> H <sub>57</sub> N <sub>2</sub> OSi <sub>2</sub> Y | C <sub>33</sub> H <sub>57</sub> N <sub>2</sub> OScSi <sub>2</sub> | C <sub>39</sub> H <sub>54</sub> N <sub>2</sub> OPScSi <sub>2</sub> | C <sub>45</sub> H <sub>59</sub> N <sub>3</sub> PScSi <sub>2</sub> ,<br>½C <sub>7</sub> H <sub>8</sub> |
| Formula weight                              | 642.89                                                            | 598.94                                                            | 698.95                                                             | 820.13                                                                                                |
| <i>T</i> [K]                                | 100(2)                                                            | 150(2)                                                            | 100(2)                                                             | 200(2)                                                                                                |
| Wavelength [Å]                              | 0.71073                                                           | 0.71073                                                           | 0.71073                                                            | 0.71073                                                                                               |
| Crystal system                              | Triclinic                                                         | Triclinic                                                         | Monoclinic                                                         | Monoclinic                                                                                            |
| Space group                                 | <i>P</i> -1                                                       | <i>P</i> -1                                                       | <i>P</i> 2 <sub>1</sub> / <i>n</i>                                 | <i>P</i> 2 <sub>1</sub> / <i>n</i>                                                                    |
| <i>a</i> [Å]                                | 11.1445(5)                                                        | 11.1928(5)                                                        | 11.4383(5)                                                         | 12.6969(4)                                                                                            |
| <i>b</i> [Å]                                | 11.4646(5)                                                        | 11.3356(5)                                                        | 19.1282(8)                                                         | 24.2752(9)                                                                                            |
| <i>c</i> [Å]                                | 15.5390(7)                                                        | 15.4964(4)                                                        | 18.8454(8)                                                         | 15.3631(7)                                                                                            |
| $\alpha$ [°]                                | 94.646(2)                                                         | 94.893(3)                                                         | 90                                                                 | 90                                                                                                    |
| $\beta$ [°]                                 | 99.027(2)                                                         | 98.012(3)                                                         | 103.7300(10)                                                       | 94.631(4)                                                                                             |
| $\gamma$ [°]                                | 111.260(2)                                                        | 111.928(5)                                                        | 90                                                                 | 90                                                                                                    |
| <i>V</i> [Å <sup>3</sup> ]                  | 1806.72(14)                                                       | 1785.79(13)                                                       | 4005.4(3)                                                          | 4719.8(3)                                                                                             |
| <i>Z</i>                                    | 2                                                                 | 2                                                                 | 4                                                                  | 4                                                                                                     |
| $\rho_{\text{calcd}}$ [g cm <sup>-3</sup> ] | 1.182                                                             | 1.114                                                             | 1.159                                                              | 1.154                                                                                                 |
| Absorption coefficient [mm <sup>-1</sup> ]  | 1.705                                                             | 0.299                                                             | 0.314                                                              | 0.275                                                                                                 |
| <i>F</i> <sub>000</sub>                     | 688                                                               | 652                                                               | 1496                                                               | 1756                                                                                                  |
| Crystal dimensions [mm]                     | 0.36 0.24 0.09                                                    | 0.51×0.39×0.19                                                    | 0.11×0.09×0.09                                                     | 0.53×0.27×0.10                                                                                        |
| $\theta$ range for data collection [°]      | 2.00-27.09                                                        | 3.04-27.10                                                        | 2.12-26.07                                                         | 2.33-25.96                                                                                            |
| <i>hkl</i> indices                          | -14≤ <i>h</i> ≤14,<br>-14≤ <i>k</i> ≤14,<br>-19≤ <i>l</i> ≤19     | -14≤ <i>h</i> ≤14,<br>-14≤ <i>k</i> ≤14,<br>-19≤ <i>l</i> ≤19     | -14≤ <i>h</i> ≤14,<br>-23≤ <i>k</i> ≤23,<br>-23≤ <i>l</i> ≤23      | -15≤ <i>h</i> ≤15,<br>-29≤ <i>k</i> ≤29,<br>-18≤ <i>l</i> ≤18                                         |
| Reflections collected                       | 19408                                                             | 28484                                                             | 42934                                                              | 66482                                                                                                 |
| Independent                                 | 6387                                                              | 6304                                                              | 6579                                                               | 6120                                                                                                  |

|                                                                 |                                    |                                    |                                    |                                    |
|-----------------------------------------------------------------|------------------------------------|------------------------------------|------------------------------------|------------------------------------|
| reflections                                                     |                                    |                                    |                                    |                                    |
| $R_{\text{int}} [I > 2\sigma(I)]$                               | 0.0412                             | 0.0295                             | 0.0365                             | 0.0942                             |
| Completeness<br>to $\theta$ [%]                                 | 99.6                               | 98.6                               | 99.5                               | 99.9                               |
| Data / restraints /<br>parameters                               | 7928 / 1084 / 627                  | 7773/14/416                        | 7879/0/426                         | 9226/48/531                        |
| $S(F^2)$                                                        | 1.039                              | 1.042                              | 1.073                              | 1.071                              |
| Final $R$ indices<br>[ $F^2 > 2\sigma(F^2)$ ]                   | $R_1 = 0.0384,$<br>$wR_2 = 0.0879$ | $R_1 = 0.0421,$<br>$wR_2 = 0.1065$ | $R_1 = 0.0386,$<br>$wR_2 = 0.0827$ | $R_1 = 0.0672,$<br>$wR_2 = 0.1364$ |
| Final $R$ indices<br>(all data)                                 | $R_1 = 0.0554,$<br>$wR_2 = 0.0940$ | $R_1 = 0.0564,$<br>$wR_2 = 0.1161$ | $R_1 = 0.0509,$<br>$wR_2 = 0.0882$ | $R_1 = 0.1124,$<br>$wR_2 = 0.1572$ |
| Largest diff.<br>peak and hole<br>[ $\text{e}\text{\AA}^{-3}$ ] | 0.62 / -0.68                       | 0.37 / -0.35                       | 0.30 / -0.34                       | 0.44 / -0.37                       |

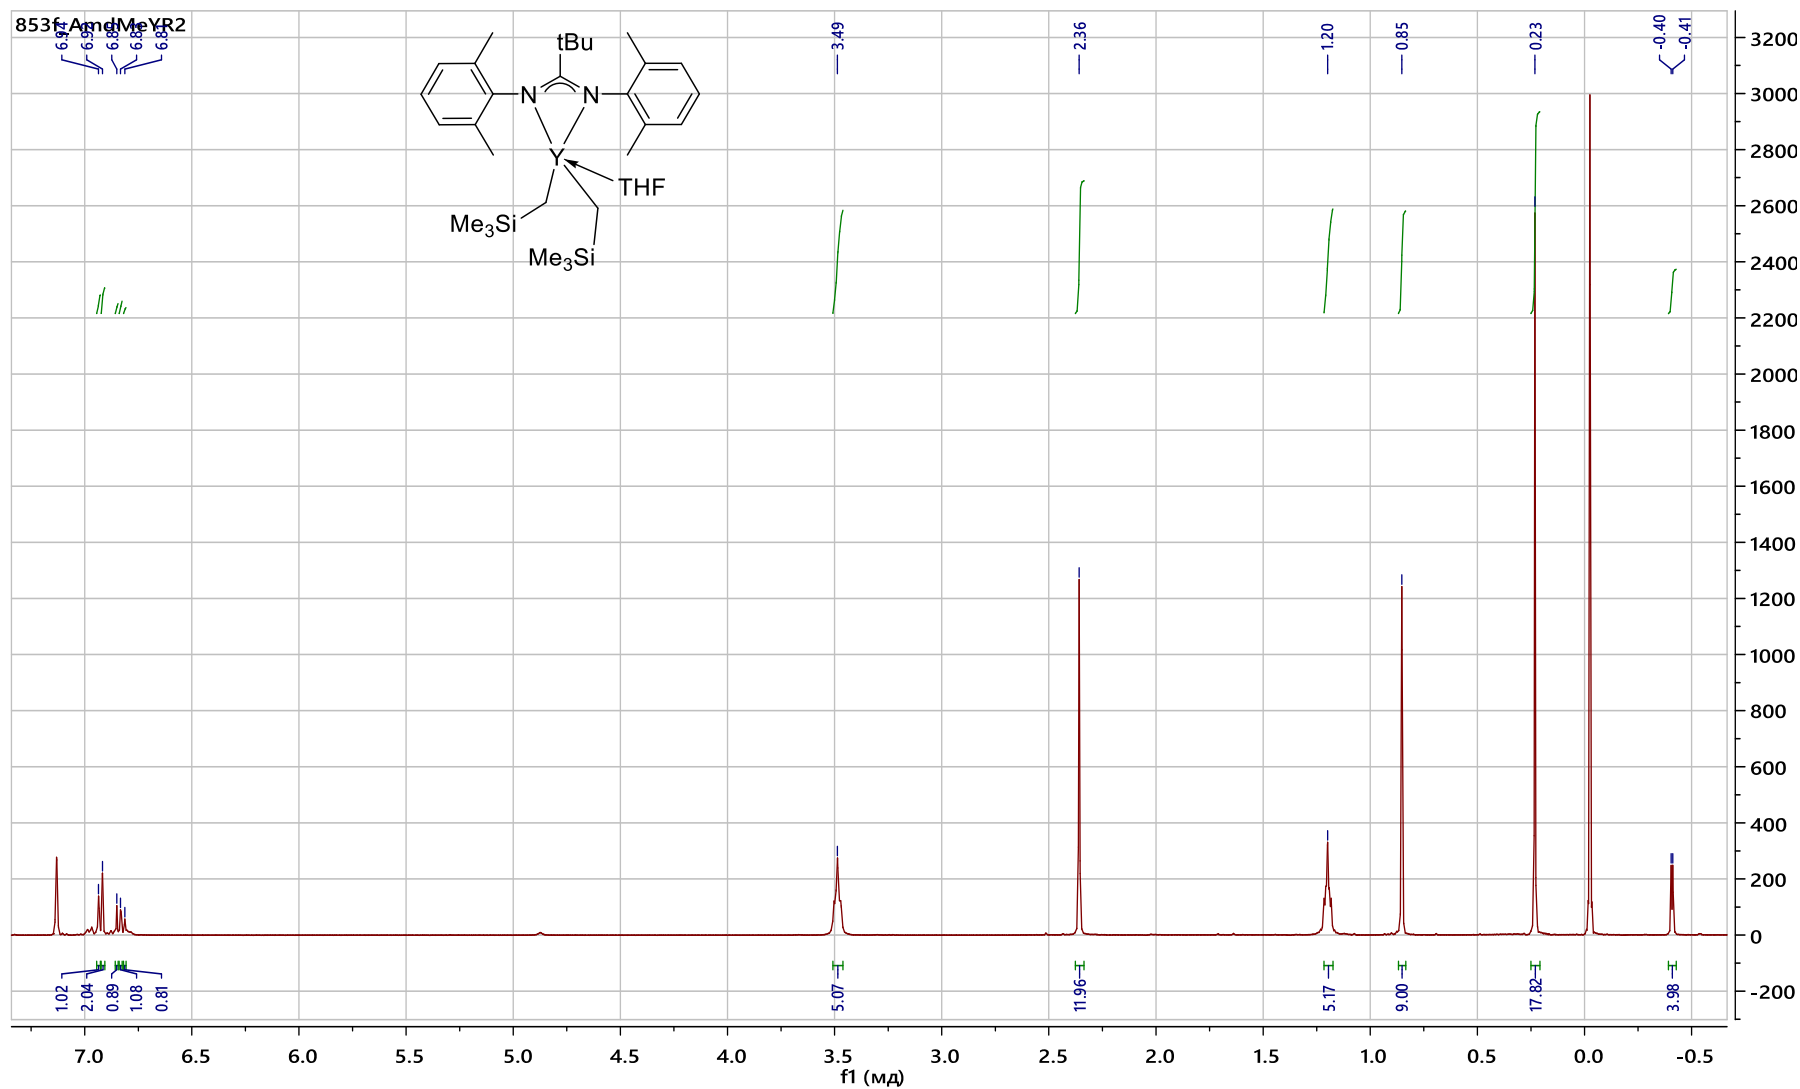

**Figure S1.**  $^1\text{H}$  NMR spectrum (400 MHz,  $\text{C}_6\text{D}_6$ , 20  $^\circ\text{C}$ ) of  $\{(2,6\text{-Me}_2\text{C}_6\text{H}_3)\text{NC}(\text{tBu})\text{N}(2,6\text{-Me}_2\text{C}_6\text{H}_3)\}\text{Y}(\text{CH}_2\text{SiMe}_3)_2(\text{THF})$  (**1**).

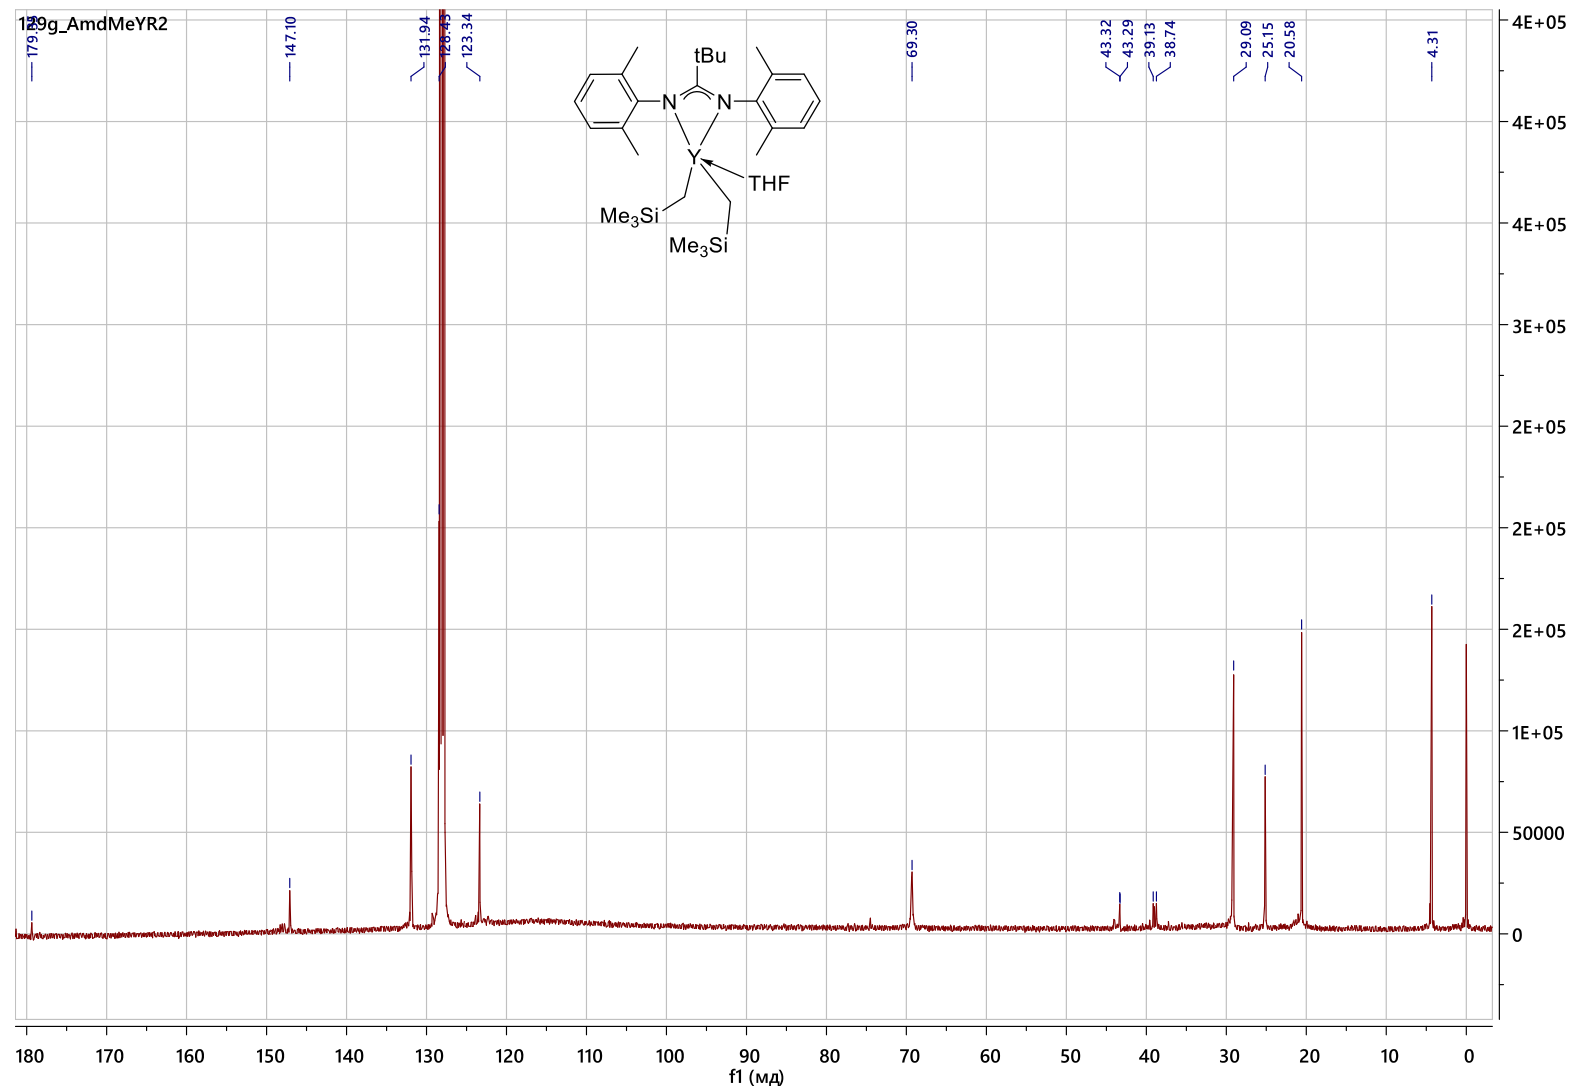

**Figure S2.**  $^{13}\text{C}\{^1\text{H}\}$  NMR spectrum (100.62 MHz,  $\text{C}_6\text{D}_6$ , 20 °C) of  $\{(2,6\text{-Me}_2\text{C}_6\text{H}_3)\text{NC}(\text{tBu})\text{N}(2,6\text{-Me}_2\text{C}_6\text{H}_3)\}\text{Y}(\text{CH}_2\text{SiMe}_3)_2(\text{THF})$  (**1**).

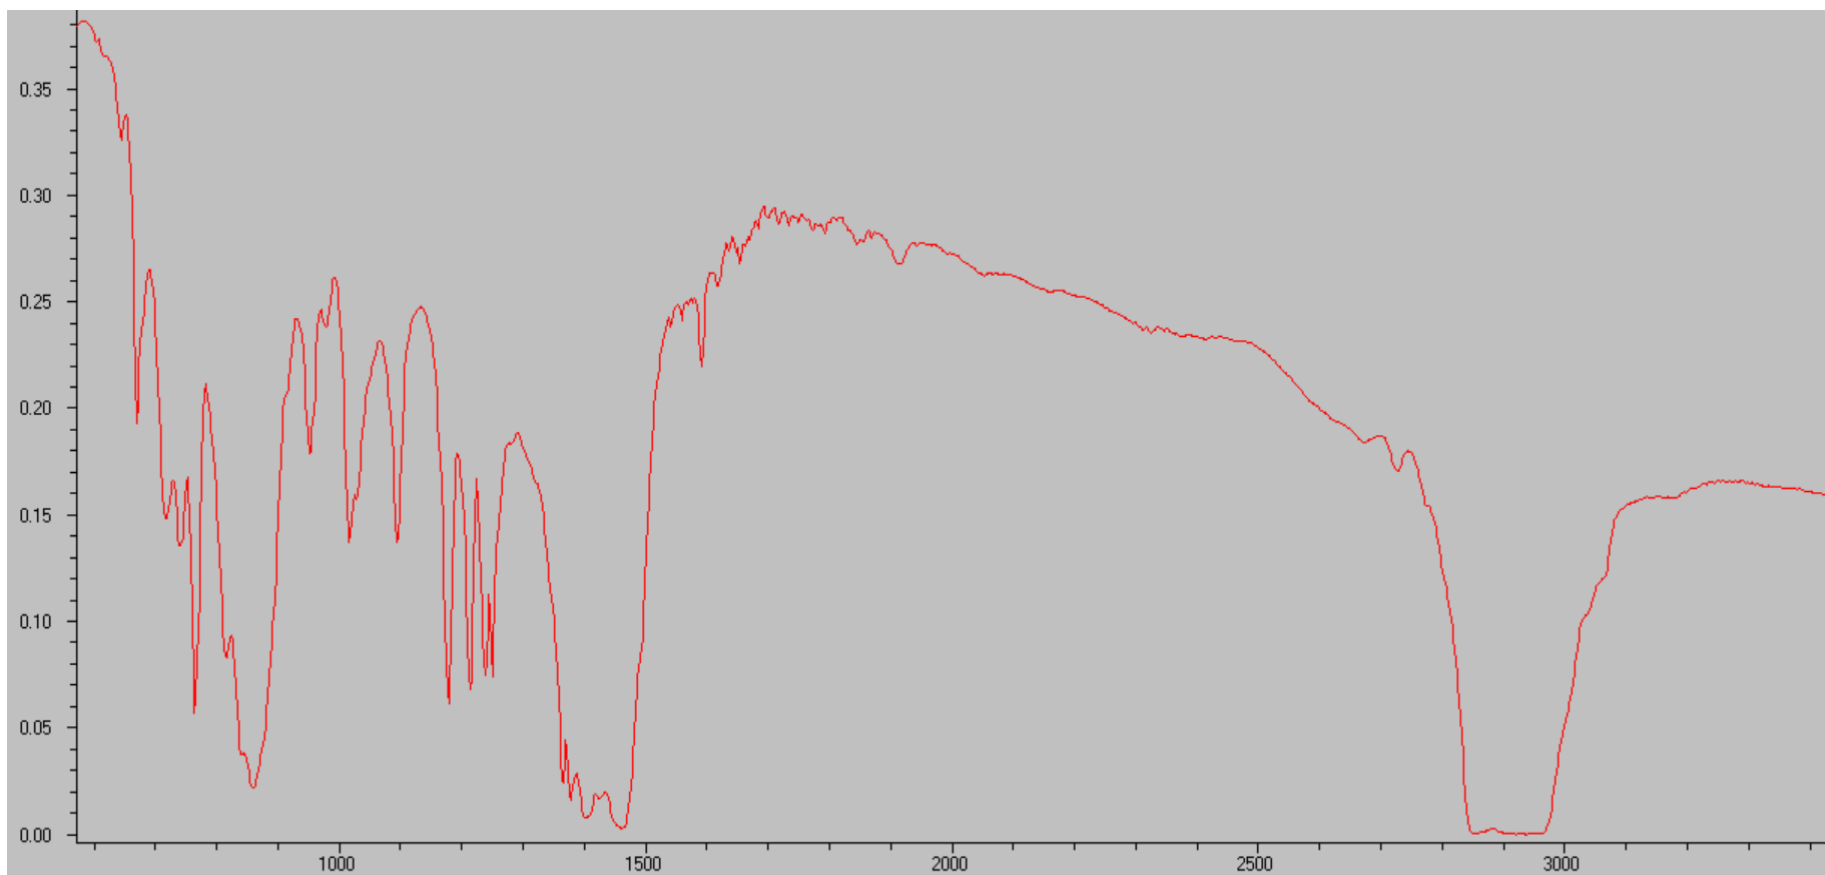

**Figure S3.** IR spectrum of  $\{(2,6\text{-Me}_2\text{C}_6\text{H}_3)\text{NC}(\text{tBu})\text{N}(2,6\text{-Me}_2\text{C}_6\text{H}_3)\}\text{Y}(\text{CH}_2\text{SiMe}_3)_2(\text{THF})$  (**1**).

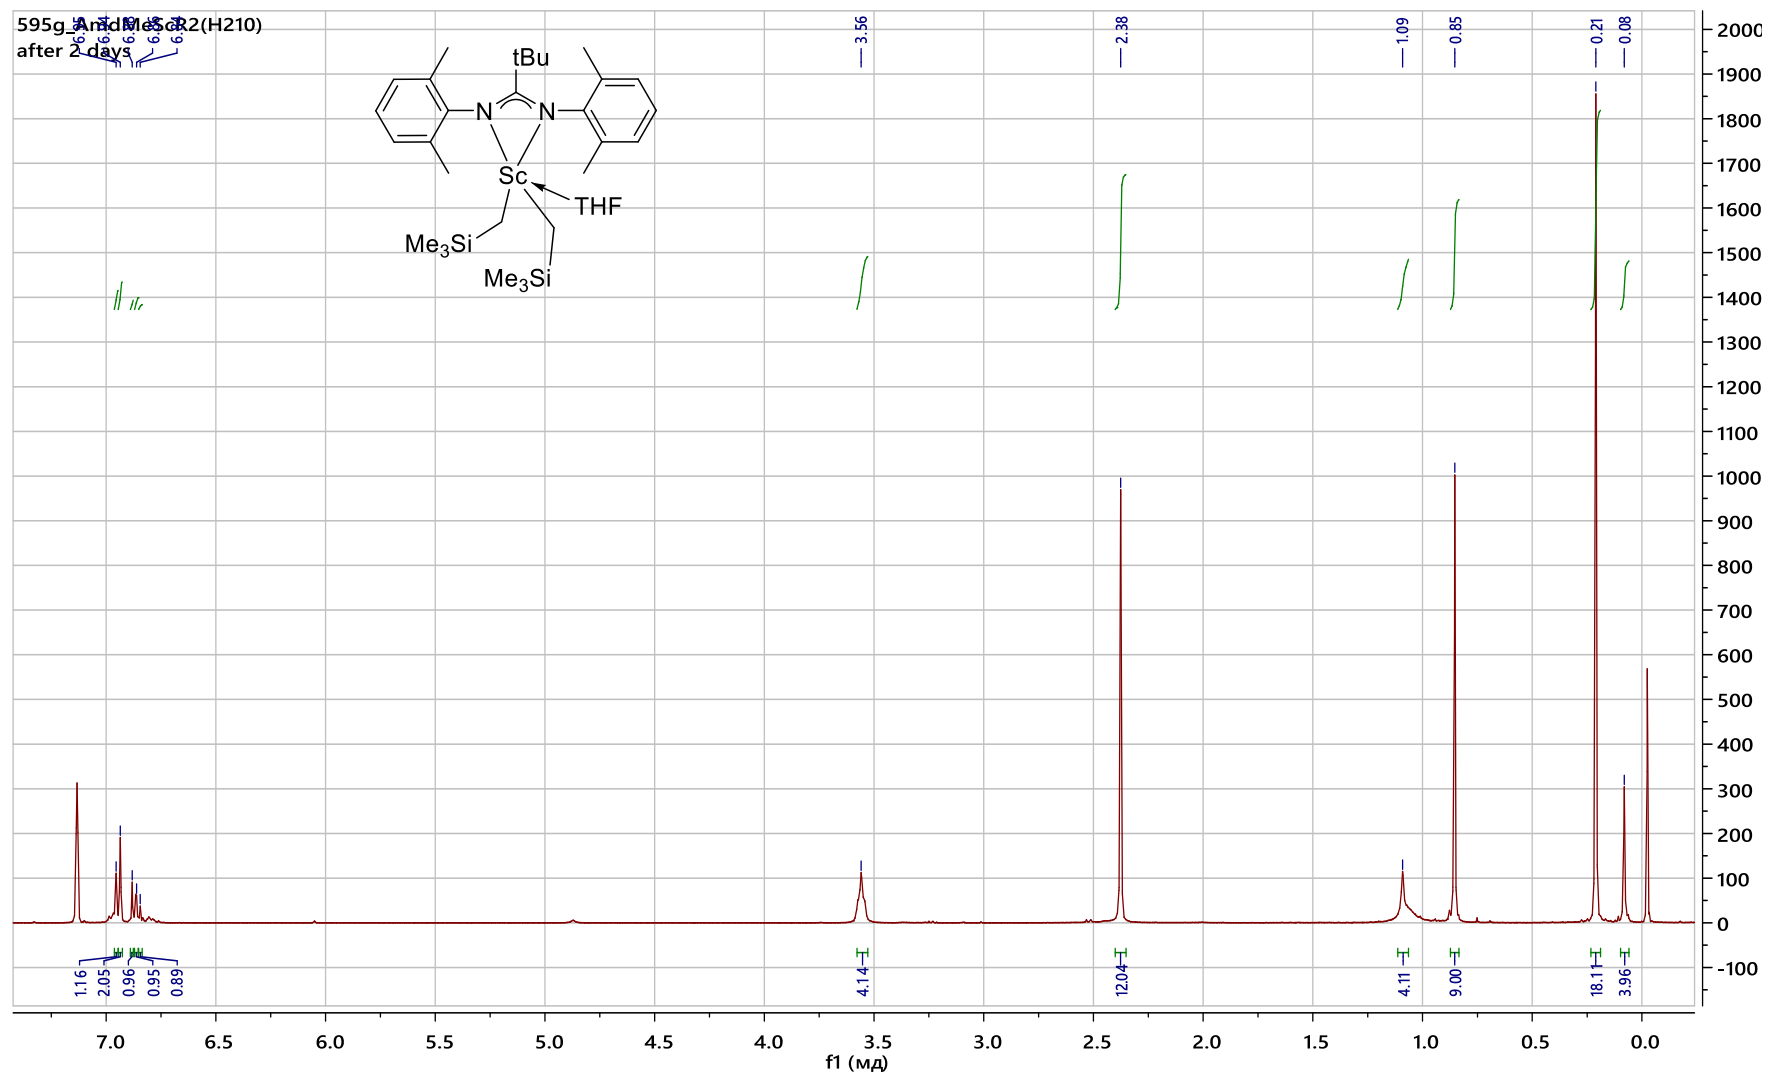

**Figure S4.**  $^1\text{H}$  NMR spectrum (400 MHz,  $\text{C}_6\text{D}_6$ , 20 °C) of  $\{(2,6\text{-Me}_2\text{C}_6\text{H}_3)\text{NC}(\text{tBu})\text{N}(2,6\text{-Me}_2\text{C}_6\text{H}_3)\}\text{Sc}(\text{CH}_2\text{SiMe}_3)_2(\text{THF})$  (**2**).



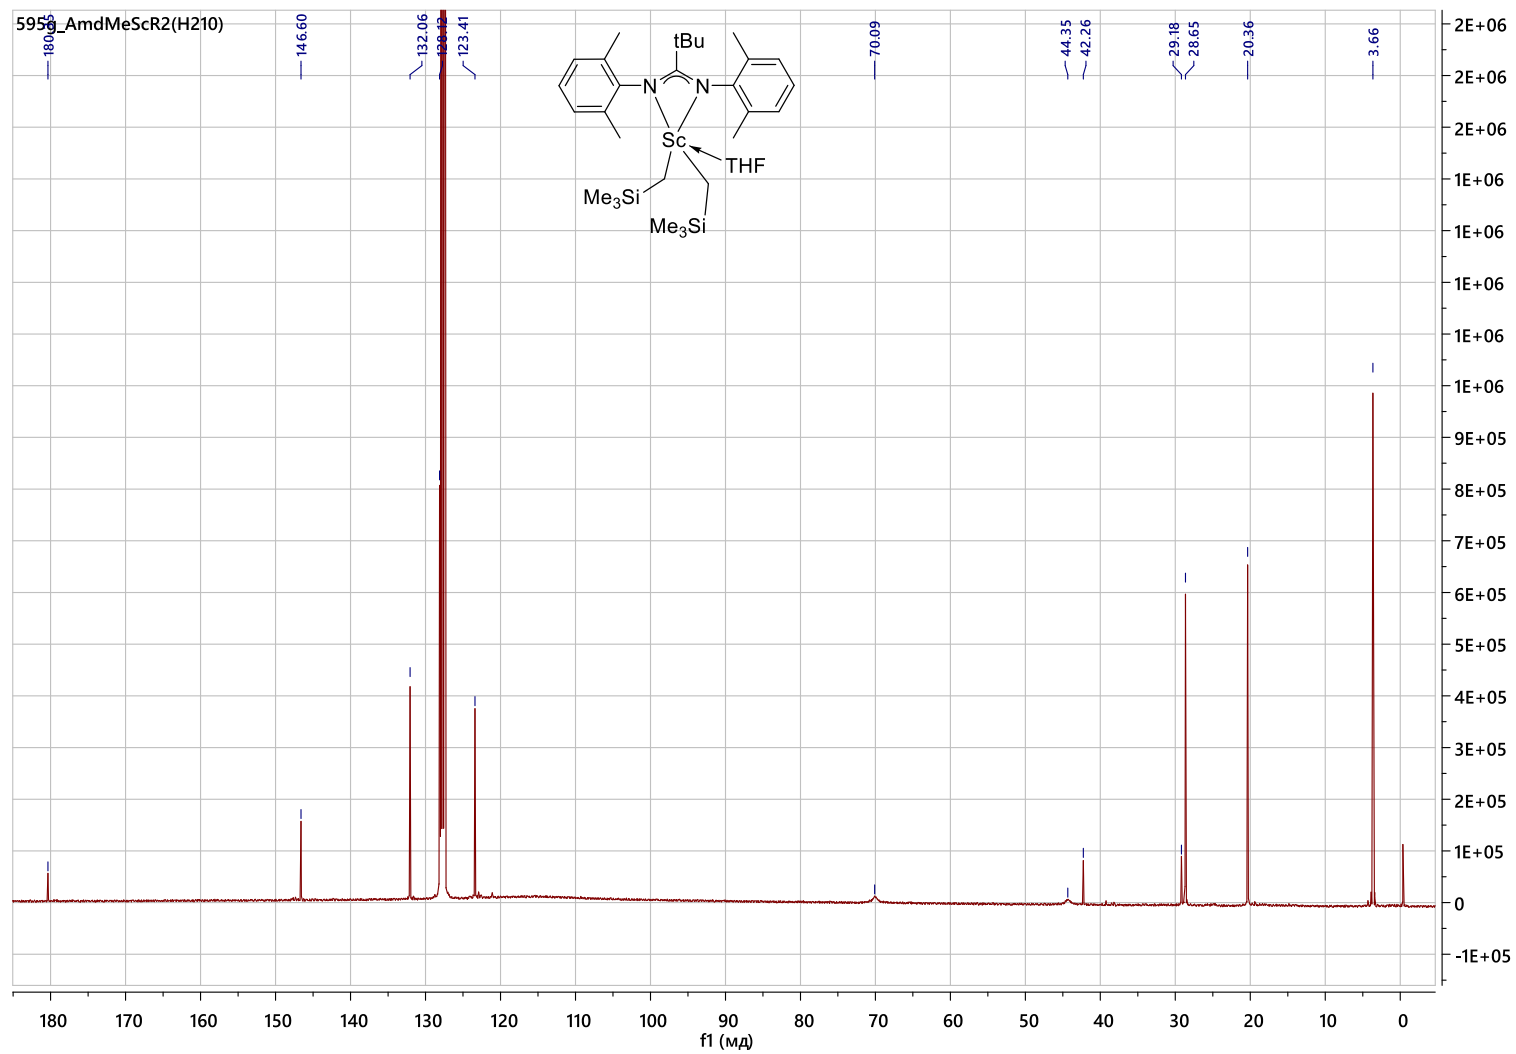

**Figure S5.**  $^{13}\text{C}\{^1\text{H}\}$  NMR spectrum (100.62 MHz,  $\text{C}_6\text{D}_6$ , 20 °C) of  $\{(2,6\text{-Me}_2\text{C}_6\text{H}_3)\text{NC}(\text{tBu})\text{N}(2,6\text{-Me}_2\text{C}_6\text{H}_3)\}\text{Sc}(\text{CH}_2\text{SiMe}_3)_2(\text{THF})$  (**2**).

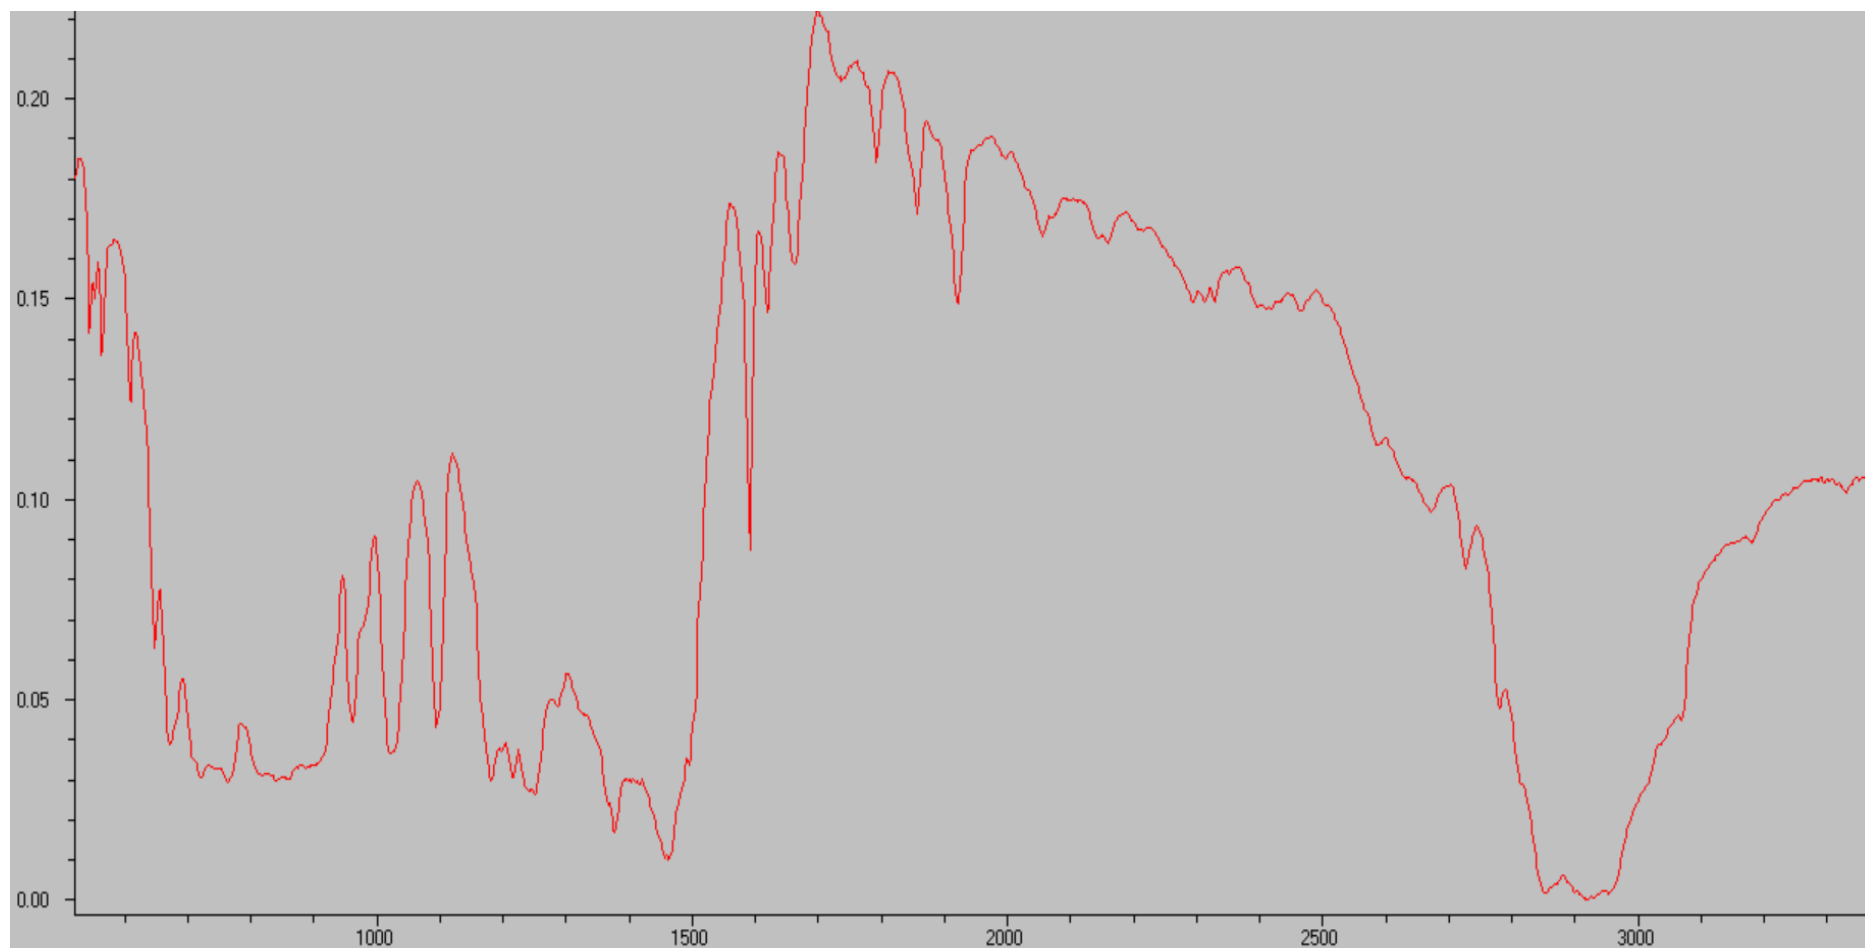

**Figure S6.** IR spectrum of  $\{(2,6\text{-Me}_2\text{C}_6\text{H}_3)\text{NC}(\text{tBu})\text{N}(2,6\text{-Me}_2\text{C}_6\text{H}_3)\}\text{Sc}(\text{CH}_2\text{SiMe}_3)_2(\text{THF})$  (**2**).

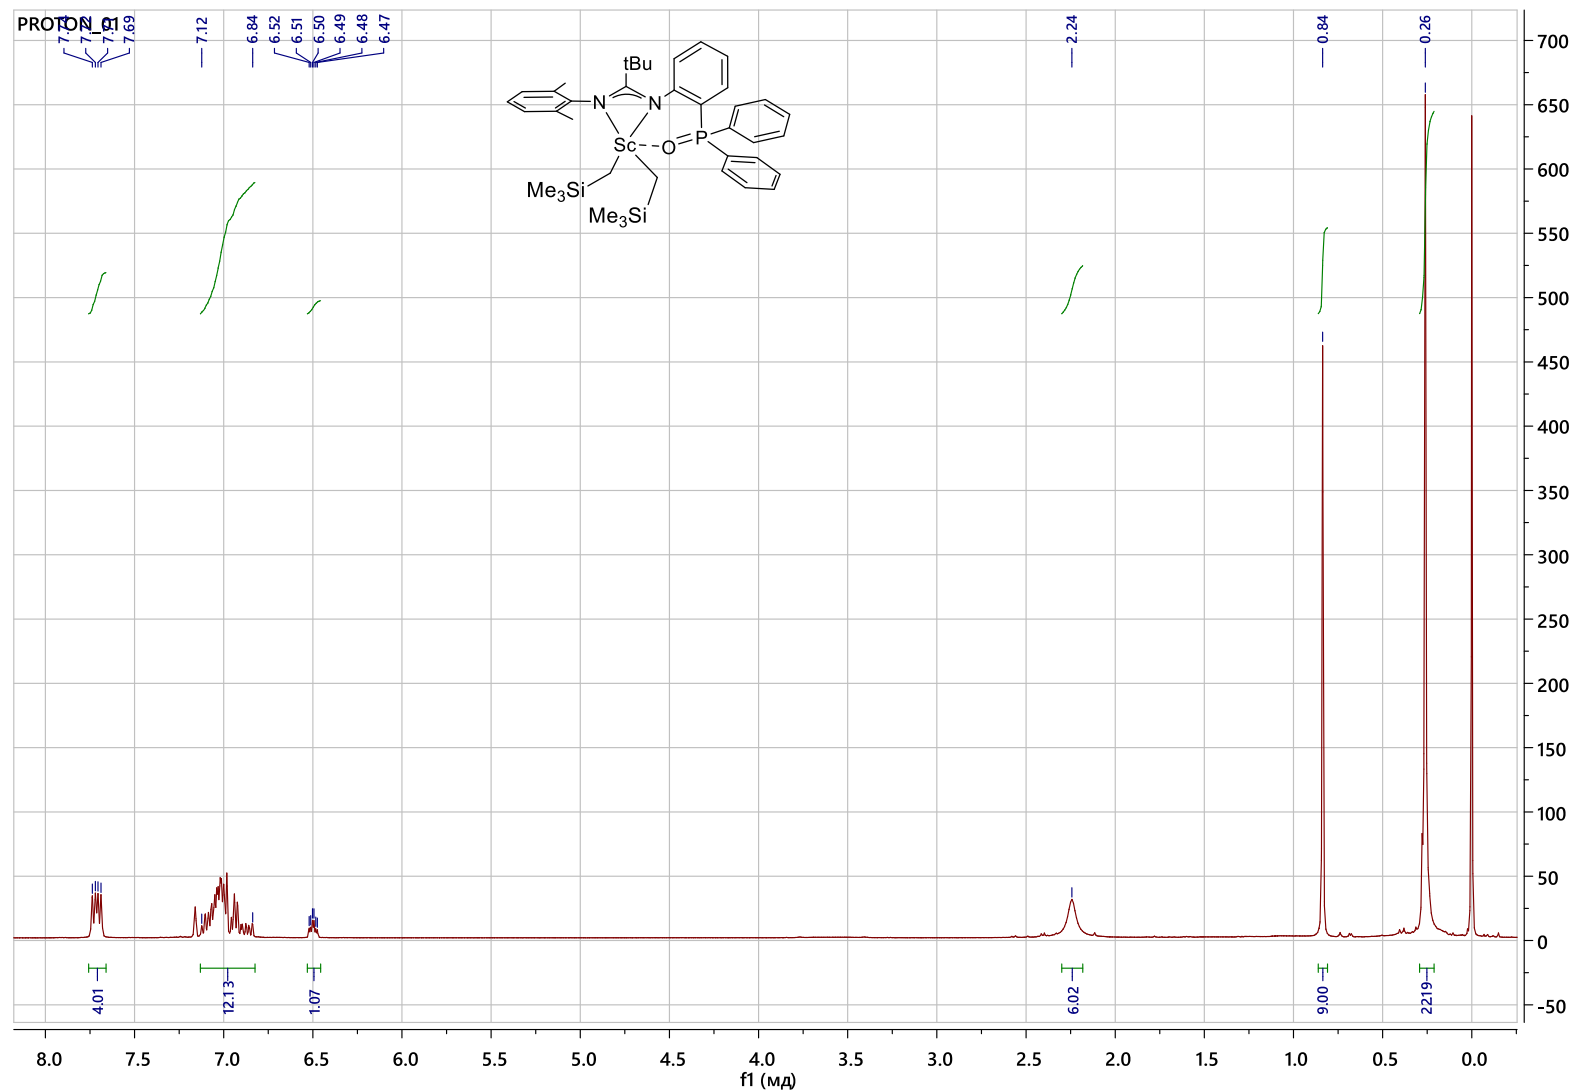

**Figure S7.**  $^1\text{H}$  NMR spectrum (400 MHz,  $\text{C}_6\text{D}_6$ , 20 °C) of  $\{2\text{-}[\text{Ph}_2\text{P}(\text{O})]\text{C}_6\text{H}_4\text{NC}(\text{tBu})\text{N}(2,6\text{-Me}_2\text{C}_6\text{H}_3)\}\text{Sc}(\text{CH}_2\text{SiMe}_3)_2$  (**3**).

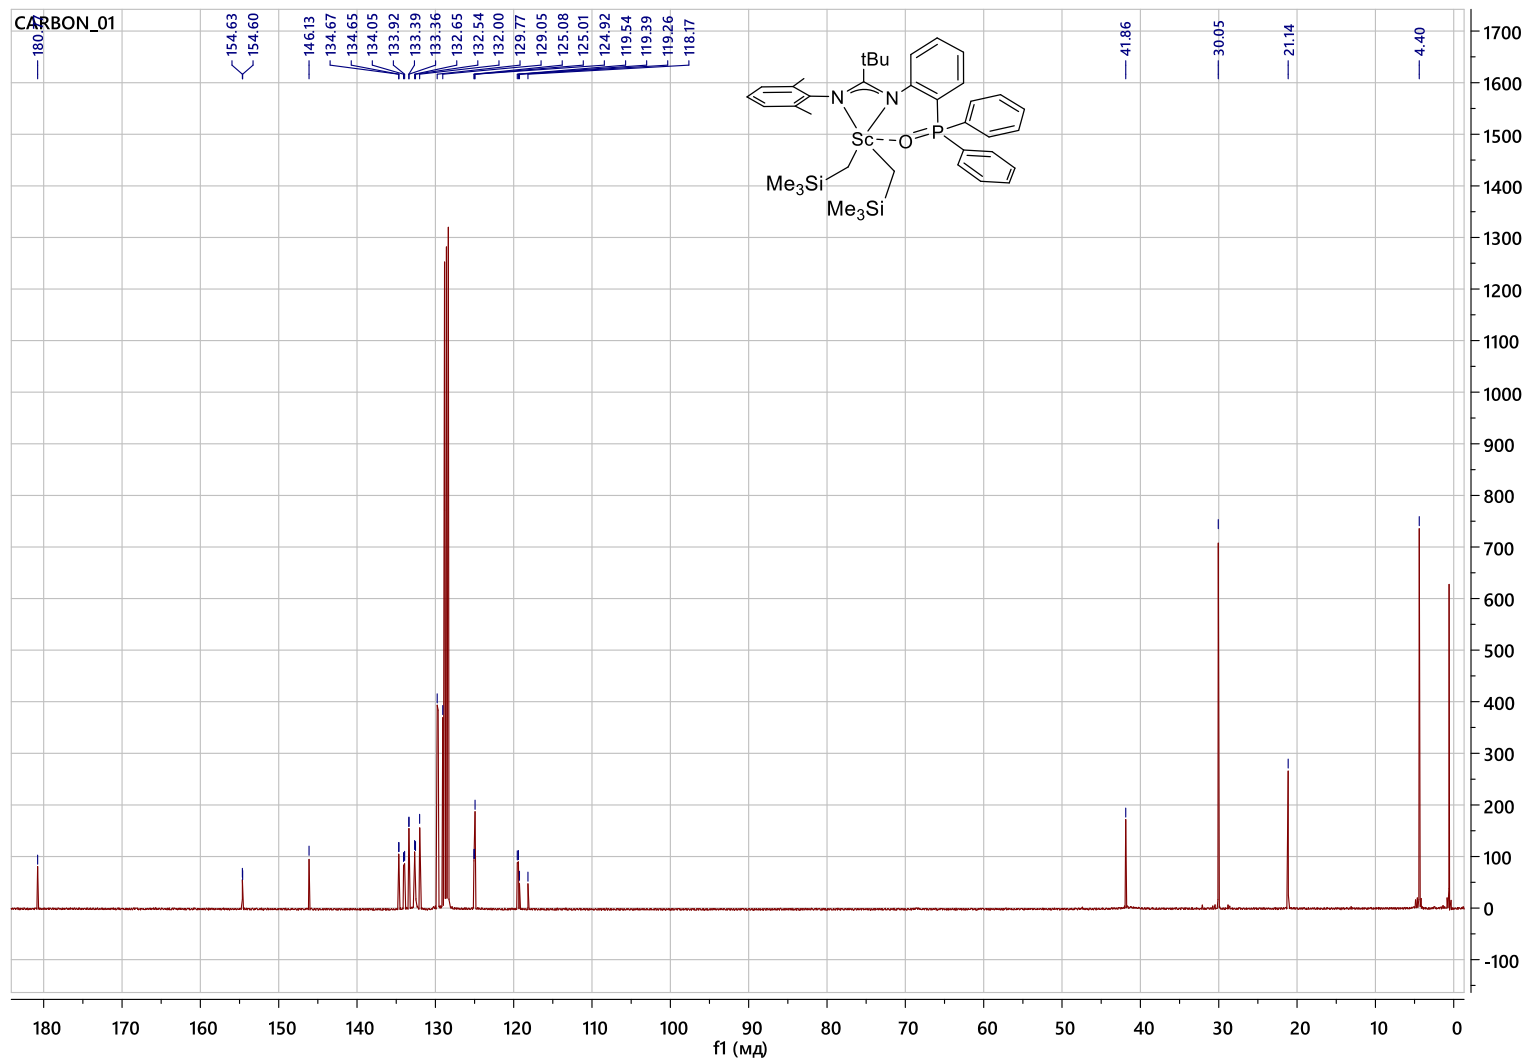

**Figure S8.**  $^{13}\text{C}\{^1\text{H}\}$  NMR spectrum (100.62 MHz,  $\text{C}_6\text{D}_6$ , 20 °C) of  $\{2\text{-}[\text{Ph}_2\text{P}(\text{O})\text{C}_6\text{H}_4\text{NC}(\text{tBu})\text{N}(2,6\text{-Me}_2\text{C}_6\text{H}_3)]\text{Sc}(\text{CH}_2\text{SiMe}_3)_2\}$  (**3**).

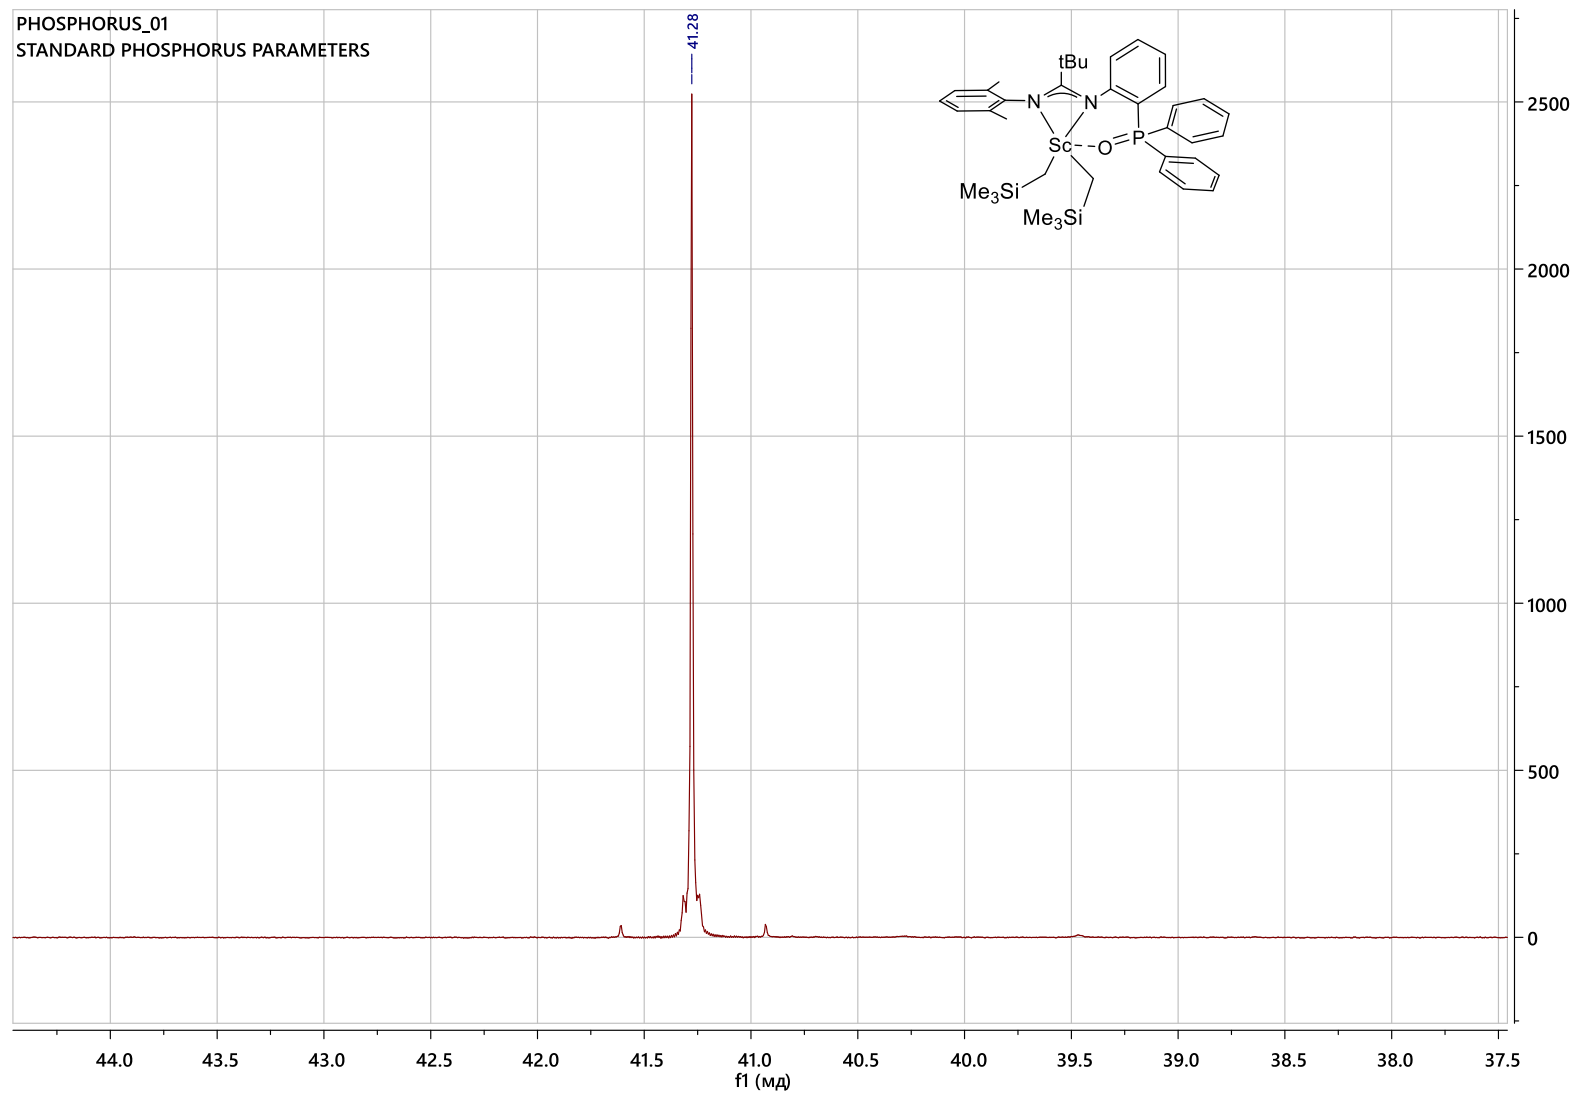

**Figure S9.**  $^{31}\text{P}\{^1\text{H}\}$  NMR spectrum (161.99 MHz,  $\text{C}_6\text{D}_6$ , 20 °C) of  $\{2\text{-}[\text{Ph}_2\text{P}(\text{O})]\text{C}_6\text{H}_4\text{NC}(\text{tBu})\text{N}(2,6\text{-Me}_2\text{C}_6\text{H}_3)\}\text{Sc}(\text{CH}_2\text{SiMe}_3)_2$  (**3**).

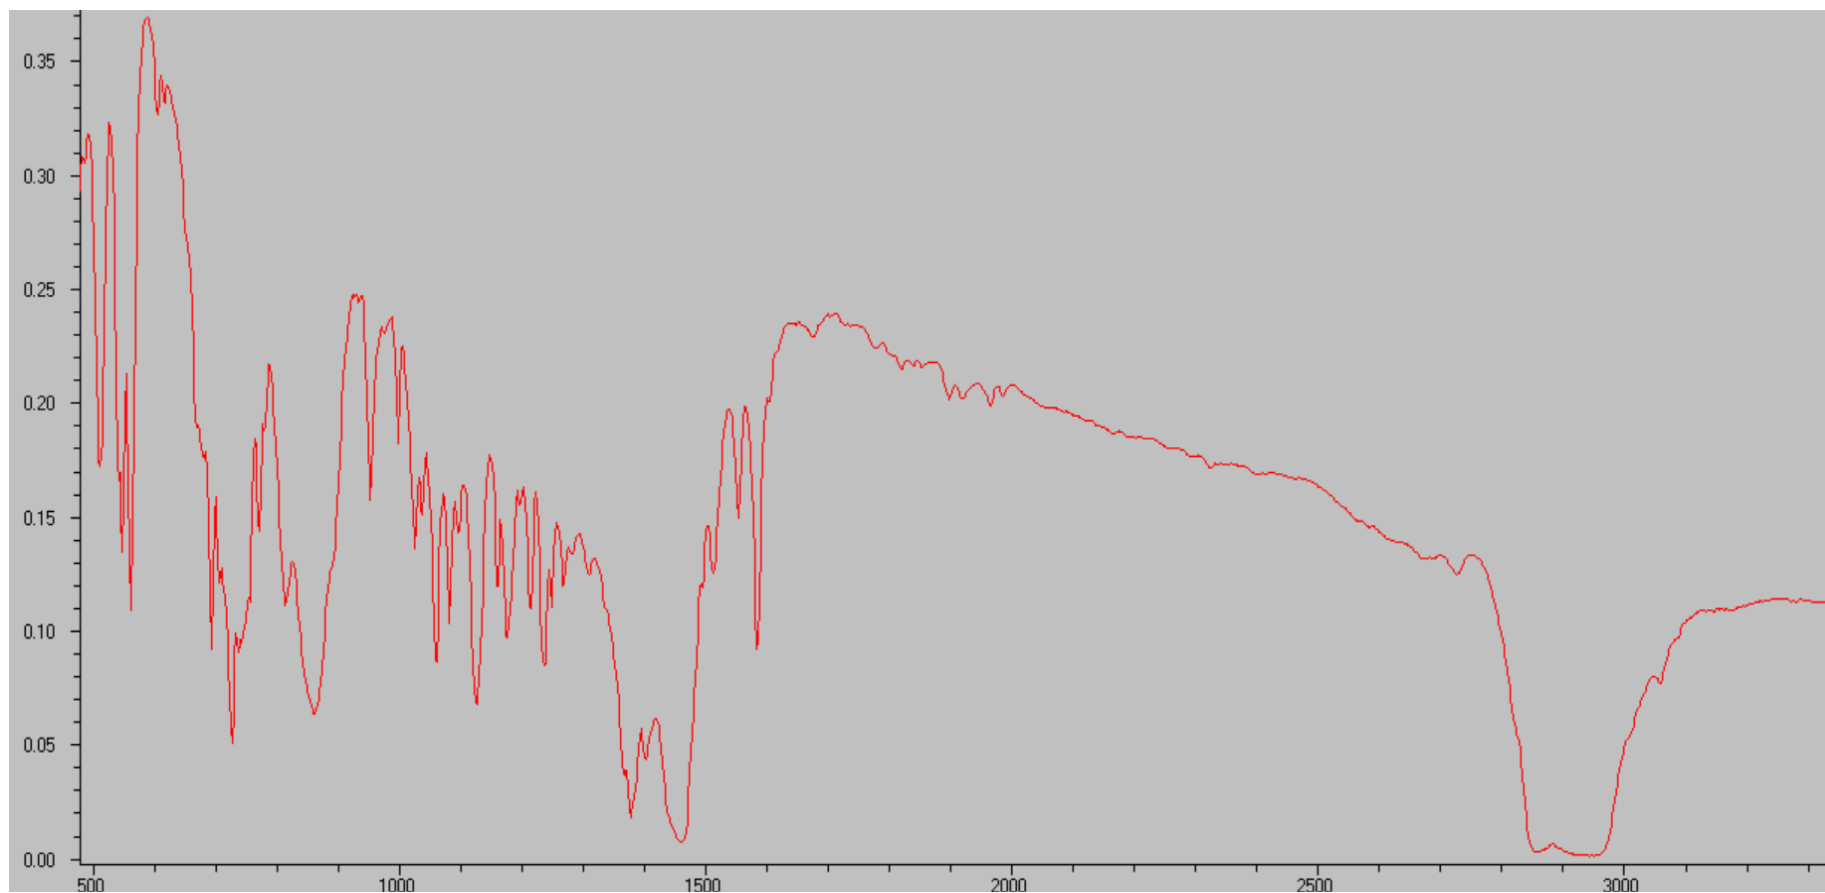

**Figure S10.** IR spectrum of  $\{2\text{-[Ph}_2\text{P(O)]C}_6\text{H}_4\text{NC(tBu)N(2,6-Me}_2\text{C}_6\text{H}_3)\}\text{Sc(CH}_2\text{SiMe}_3)_2$  (**3**).

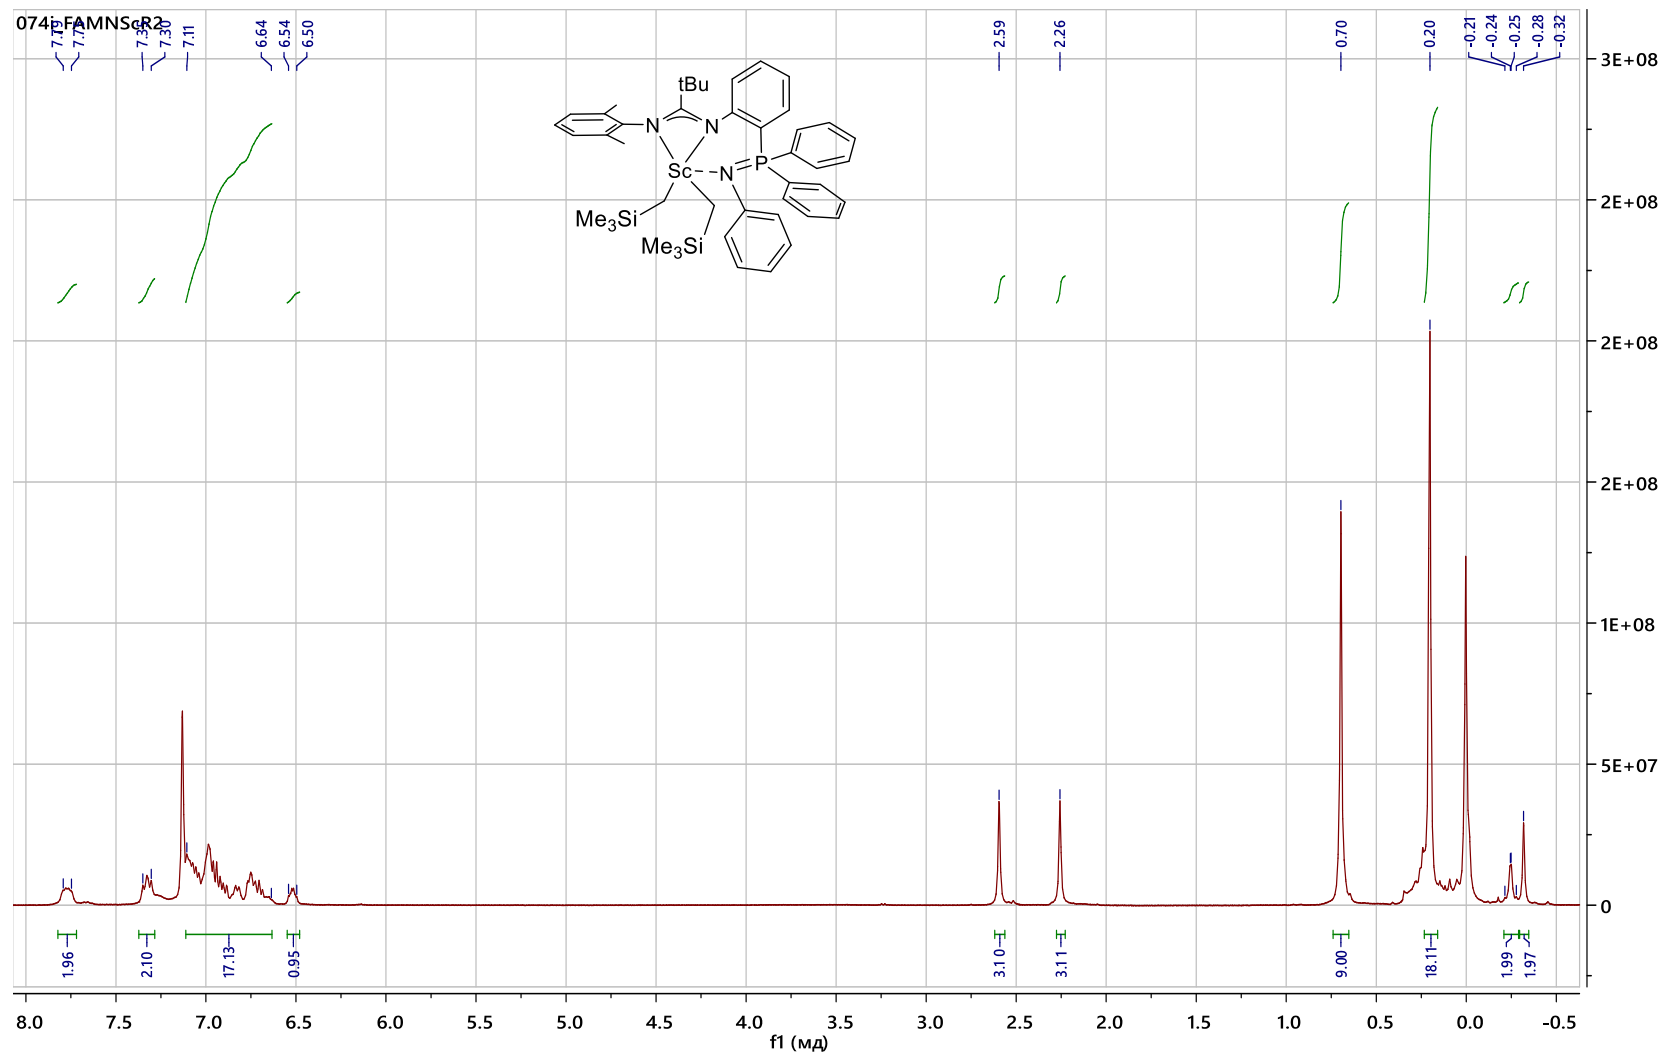

**Figure S11.**  $^1\text{H}$  NMR spectrum (400 MHz,  $\text{C}_6\text{D}_6$ , 20 °C) of  $\{2\text{-}[\text{Ph}_2\text{P}(\text{NPh})\text{C}_6\text{H}_4\text{NC}(\text{tBu})\text{N}(2,6\text{-Me}_2\text{C}_6\text{H}_3)]\text{Sc}(\text{CH}_2\text{SiMe}_3)_2\}$  (**4**).

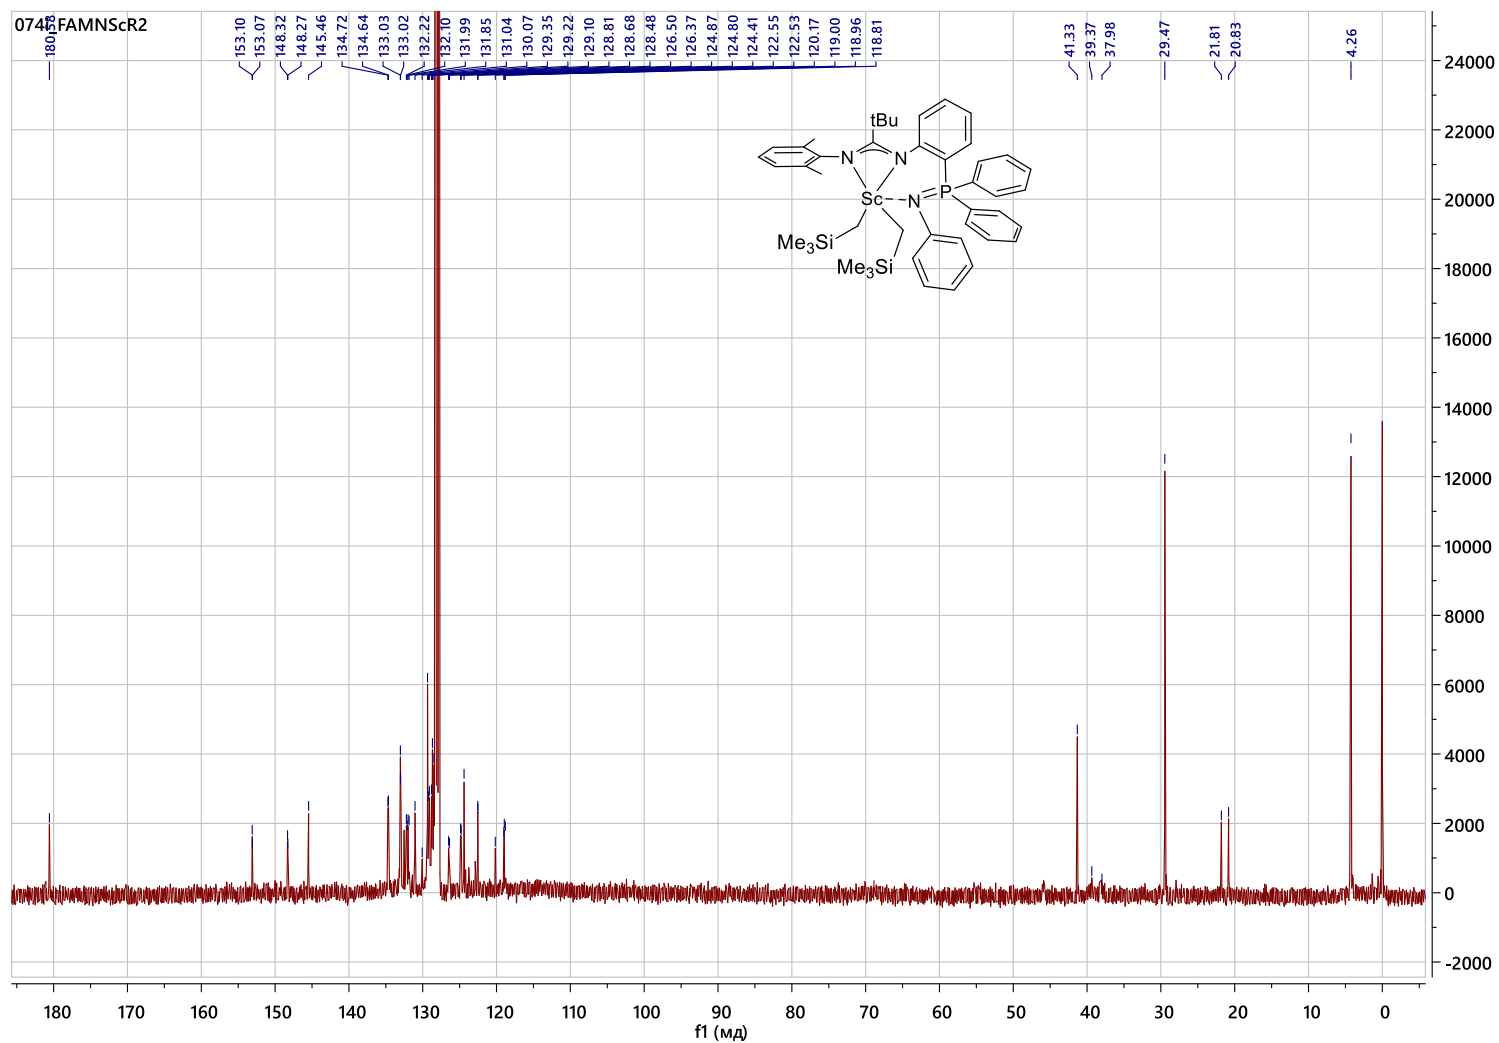

**Figure S12.**  $^{13}\text{C}\{^1\text{H}\}$  NMR spectrum (100.62 MHz,  $\text{C}_6\text{D}_6$ , 20 °C) of  $\{2\text{-}[\text{Ph}_2\text{P}(\text{NPh})]\text{C}_6\text{H}_4\text{NC}(\text{tBu})\text{N}(2,6\text{-Me}_2\text{C}_6\text{H}_3)\}\text{Sc}(\text{CH}_2\text{SiMe}_3)_2$  (**4**).



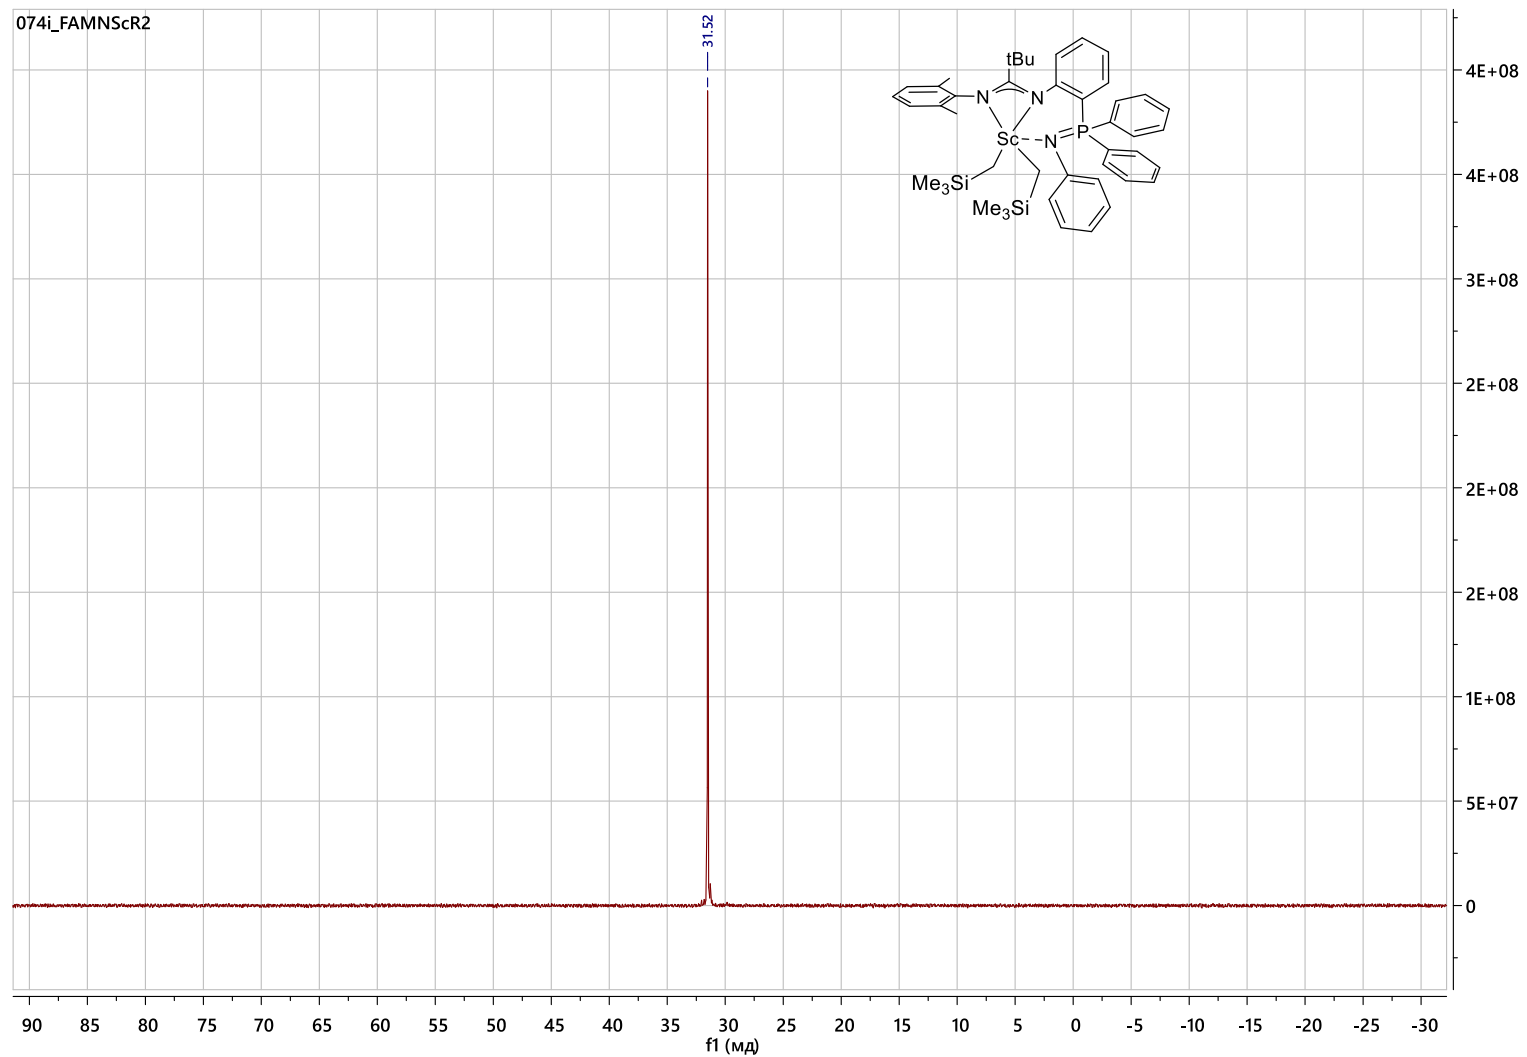

**Figure S13.**  $^{31}\text{P}\{^1\text{H}\}$  NMR spectrum (161.99 MHz,  $\text{C}_6\text{D}_6$ , 20 °C) of  $\{2\text{-}[\text{Ph}_2\text{P}(\text{NPh})]\text{C}_6\text{H}_4\text{NC}(\text{tBu})\text{N}(2,6\text{-Me}_2\text{C}_6\text{H}_3)\}\text{Sc}(\text{CH}_2\text{SiMe}_3)_2$  (**4**).

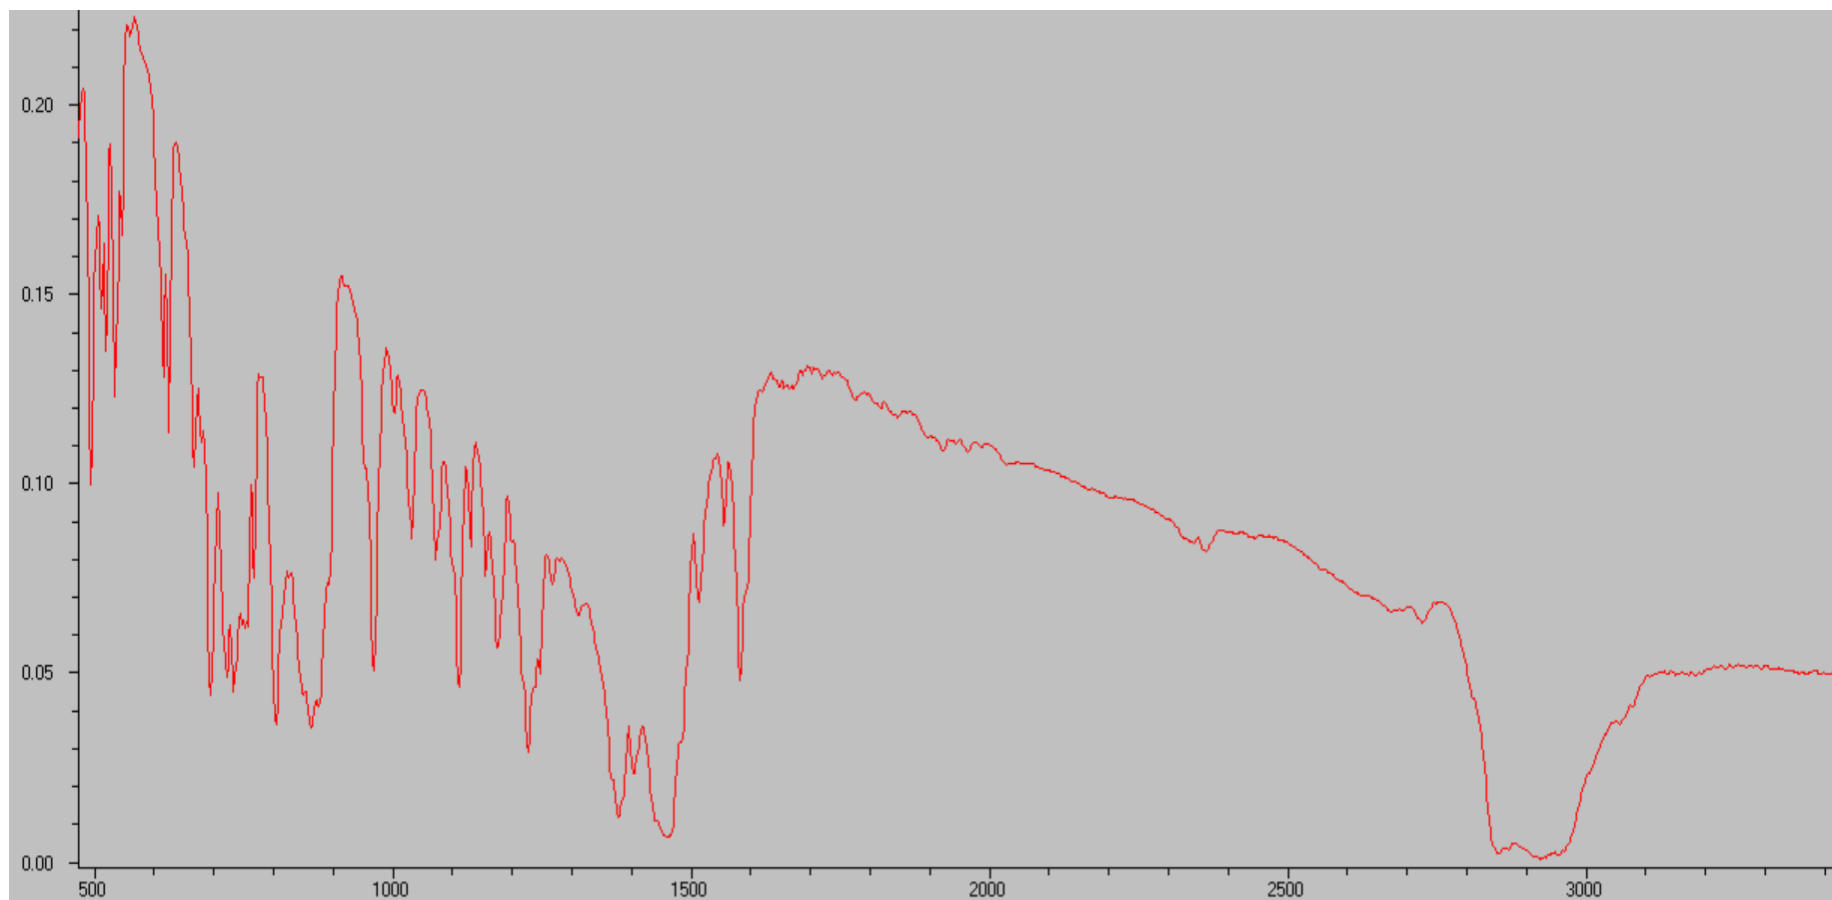

**Figure S14.** IR spectrum of  $\{2\text{-}[\text{Ph}_2\text{P}(\text{NPh})\text{C}_6\text{H}_4\text{NC}(\text{tBu})\text{N}(2,6\text{-Me}_2\text{C}_6\text{H}_3)]\text{Sc}(\text{CH}_2\text{SiMe}_3)_2\}$  (**4**).

SEC Summary information

---

S 2300/S 2400

Processing Start Time (min) = 5,943

Processing Stop Time (min) = 10,907

Number of Slices = 298

Weight Average Molecular Weight = 90864

Number Average Molecular Weight = 29792

Z Average Molecular Weight = 629457

Z+1 Average Molecular Weight = 3265914

Polydispersity index = 3,050

Peak Molecular Weight = 56292

Z Average / Weight Average = 6,927

Z+1 Average / Weight Average = 35,943

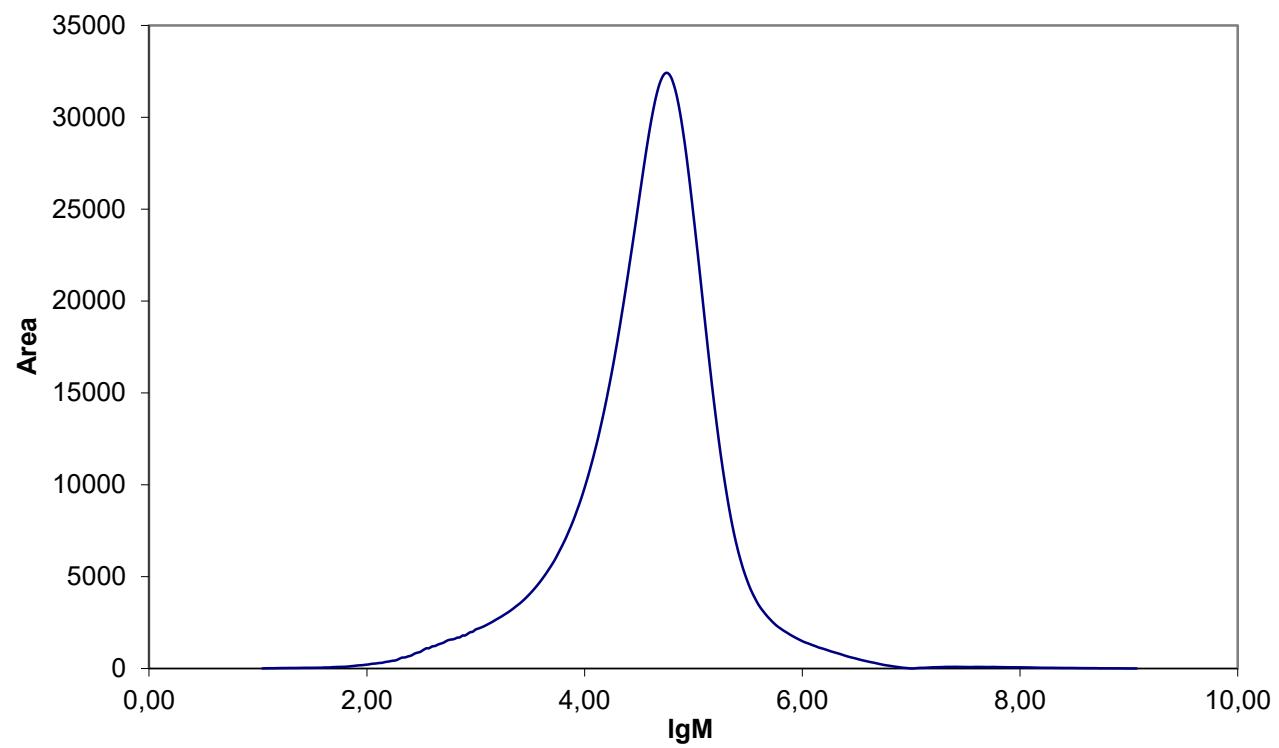

**Figure S 15.** GPC of PIP sample (Table 1, entry 1).

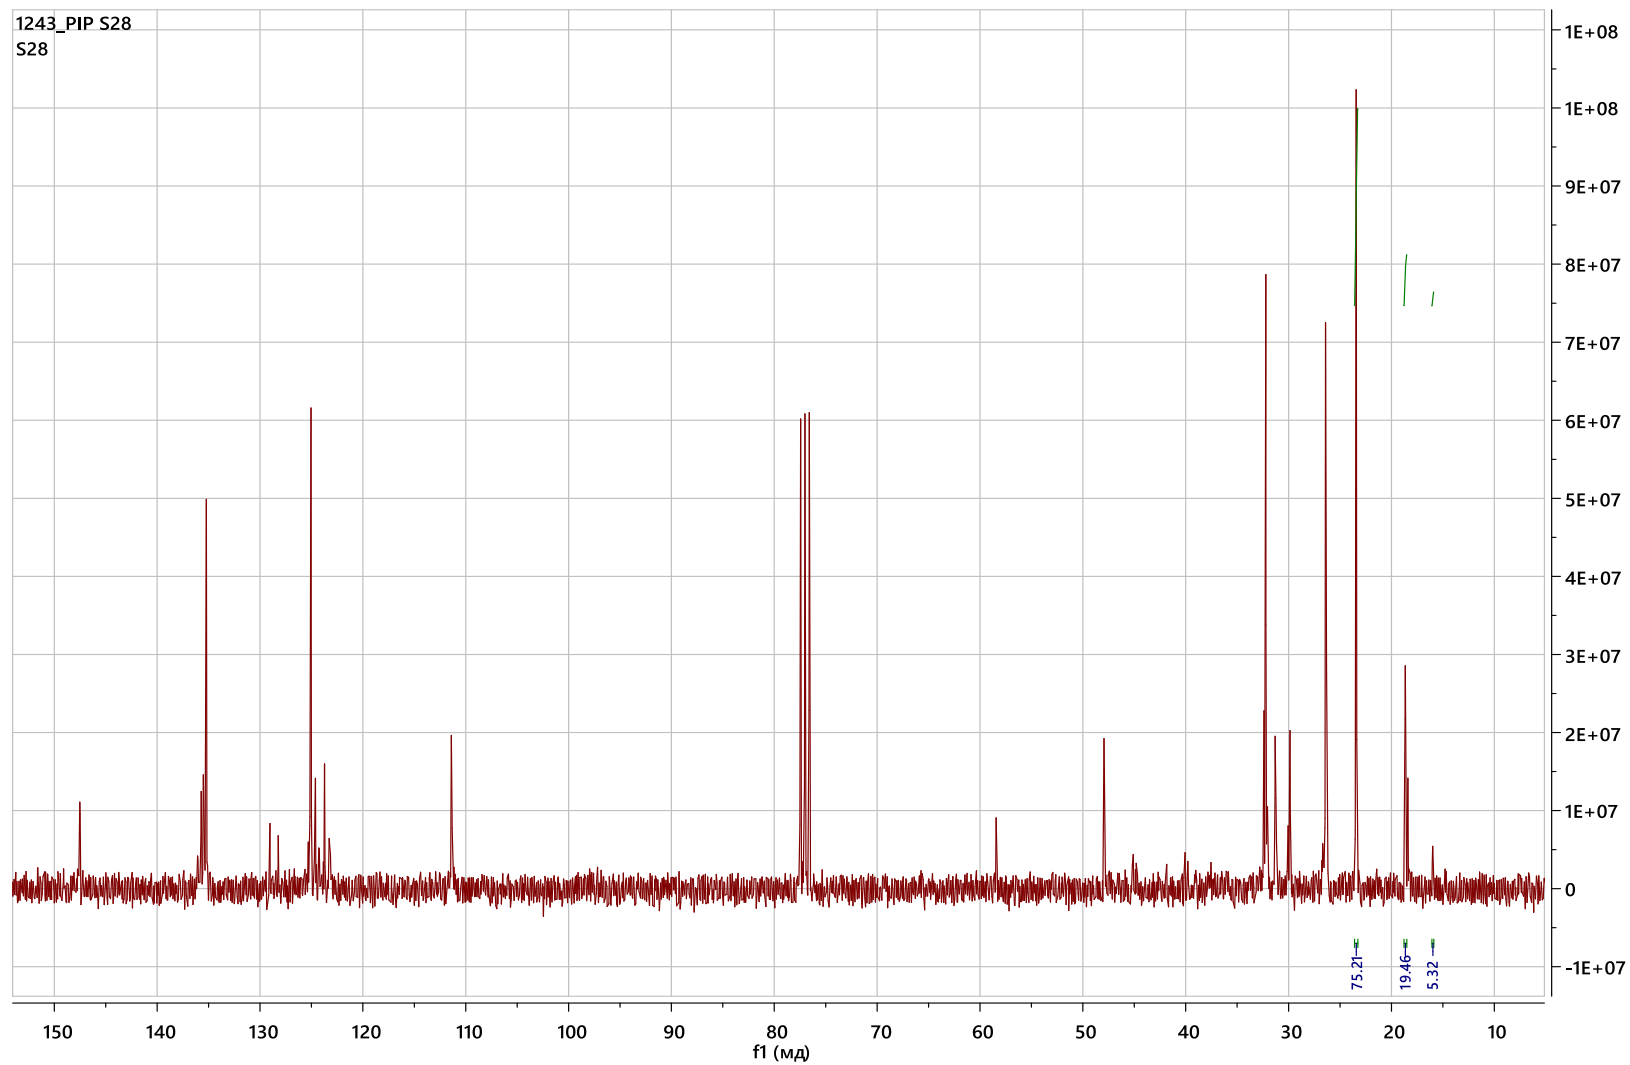

**Figure S 16.**  $^{13}\text{C}\{^1\text{H}\}$  NMR spectrum of PIP sample (Table 1, entry 1).

SEC Summary information

---

S 2300/S 2400

Processing Start Time(min) = 6,391

Processing Stop Time(min) = 10,668

Number of Slices = 257

Weight Average Molecular Weight = 232774

Number Average Molecular Weight = 83781

Z Average Molecular Weight = 515104

Z+1 Average Molecular Weight = 938324

Polydispersity index = 2,778

Peak Molecular Weight = 159264

Z Average / Weight Average = 2,213

Z+1 Average / Weight Average = 4,031

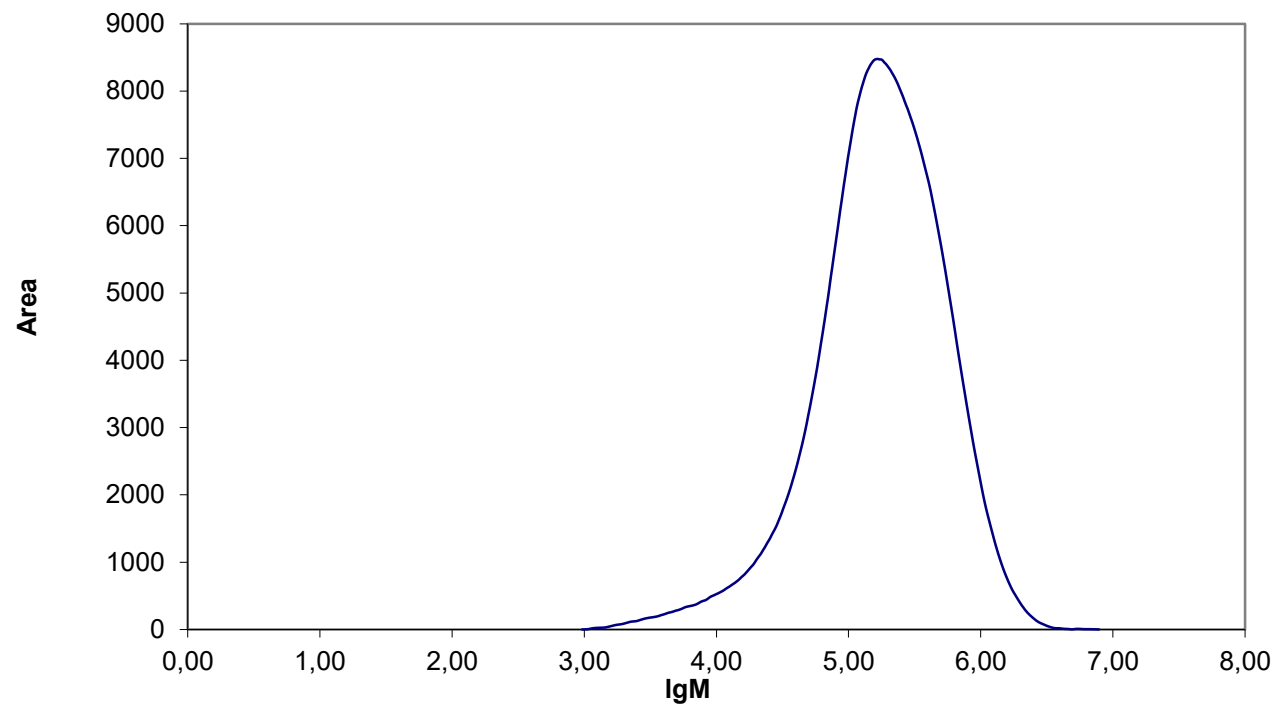

**Figure S 17.** GPC of PIP sample (Table 1, entry 2).

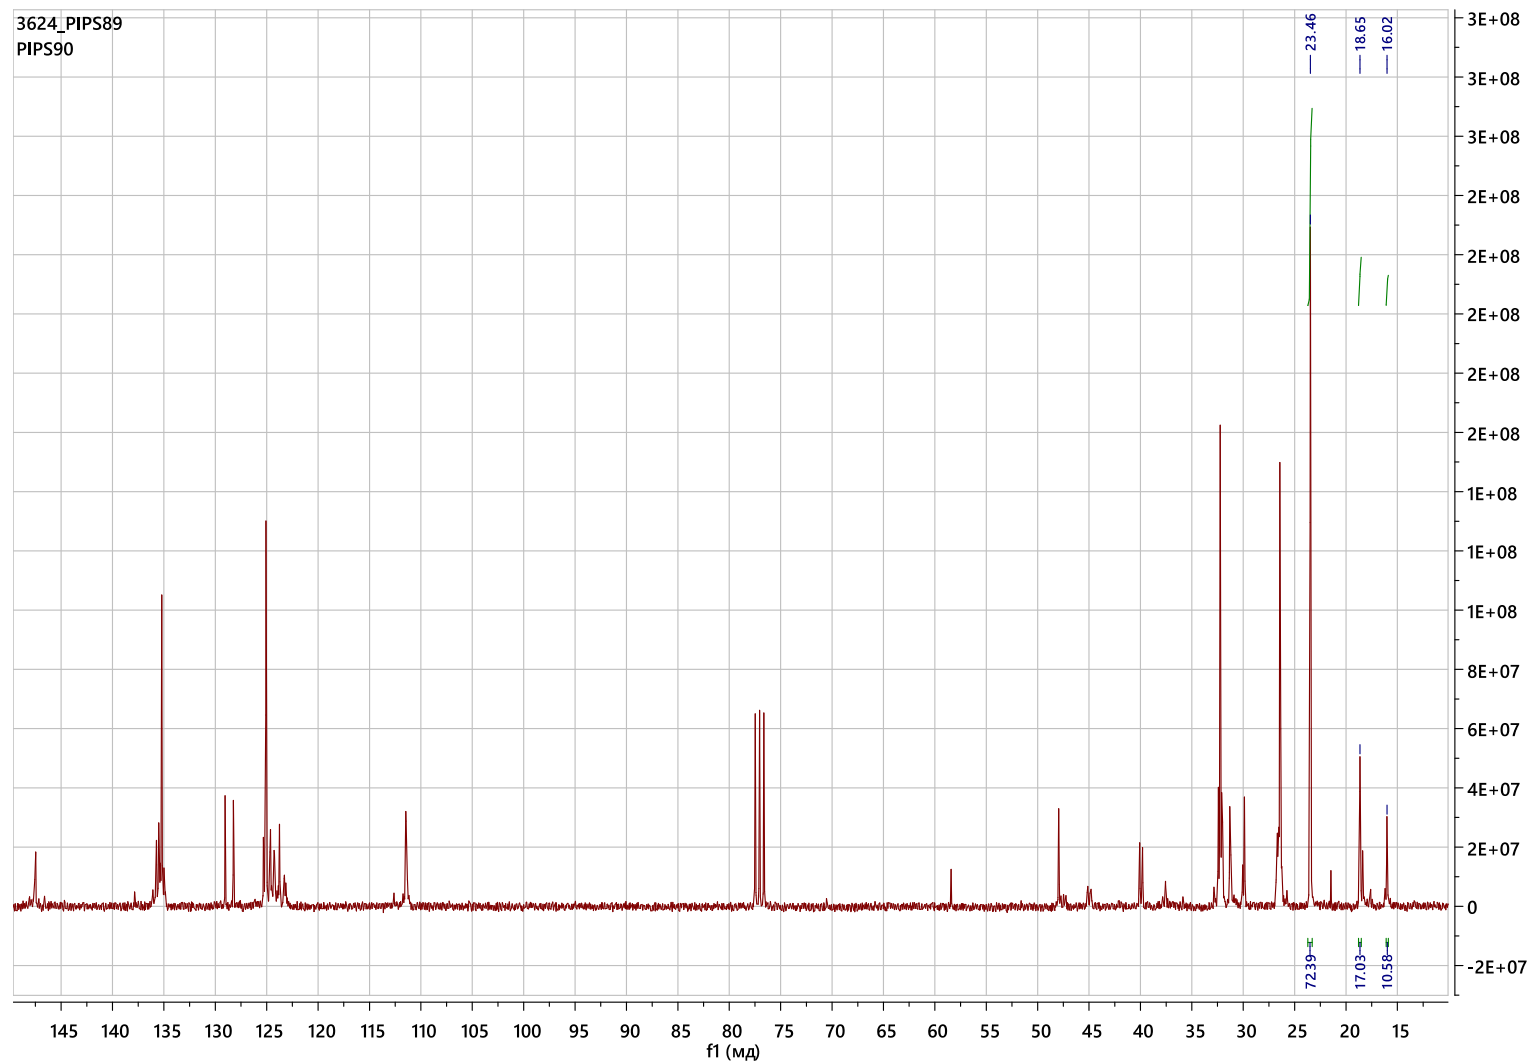

**Figure S 18.**  $^{13}\text{C}\{^1\text{H}\}$  NMR spectrum of PIP sample (Table 1, entry 2).



SEC Summary information

---

S 2300/S 2400

Processing Start Time(min) = 11,504

Processing Stop Time(min) = 15,029

Number of Slices = 212

Weight Average Molecular Weight = 3422

Number Average Molecular Weight = 1903

Z Average Molecular Weight = 6218

Z+1 Average Molecular Weight = 11922

Polydispersity index = 1,798

Peak Molecular Weight = 2615

Z Average / Weight Average = 1,817

Z+1 Average / Weight Average = 3,484

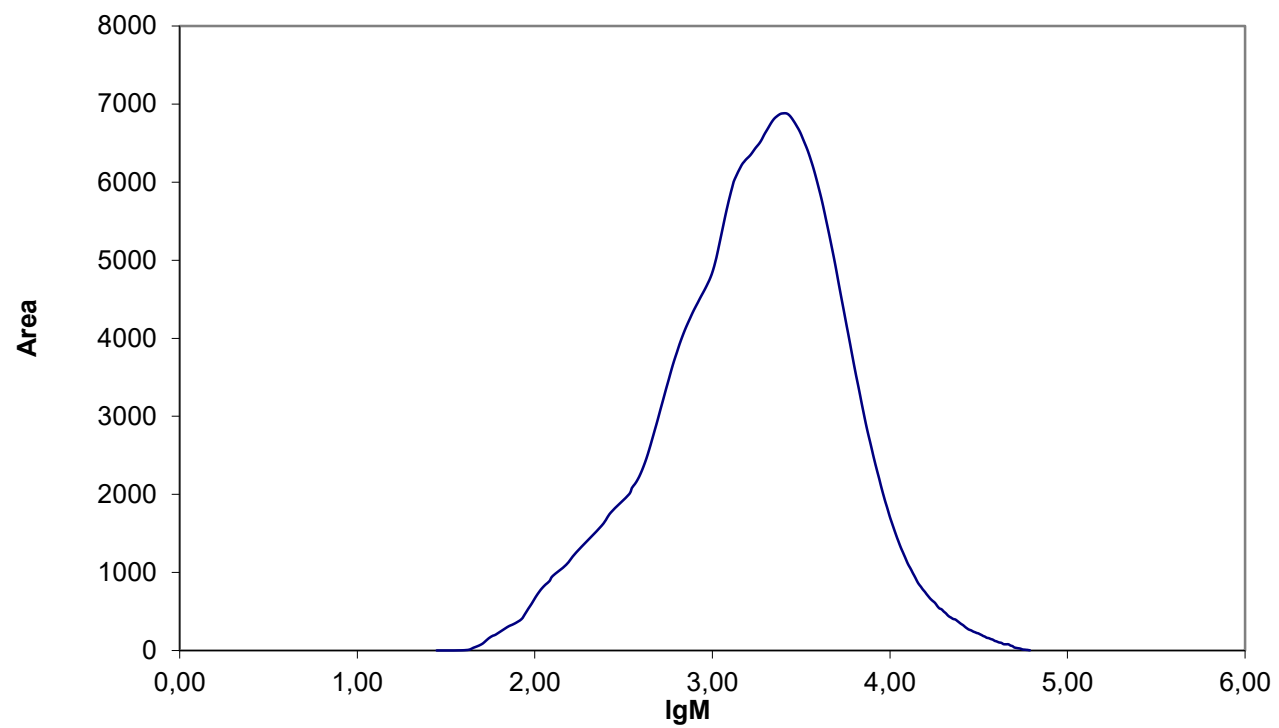

**Figure S 19.** GPC of PIP sample (Table 1, entry 5).

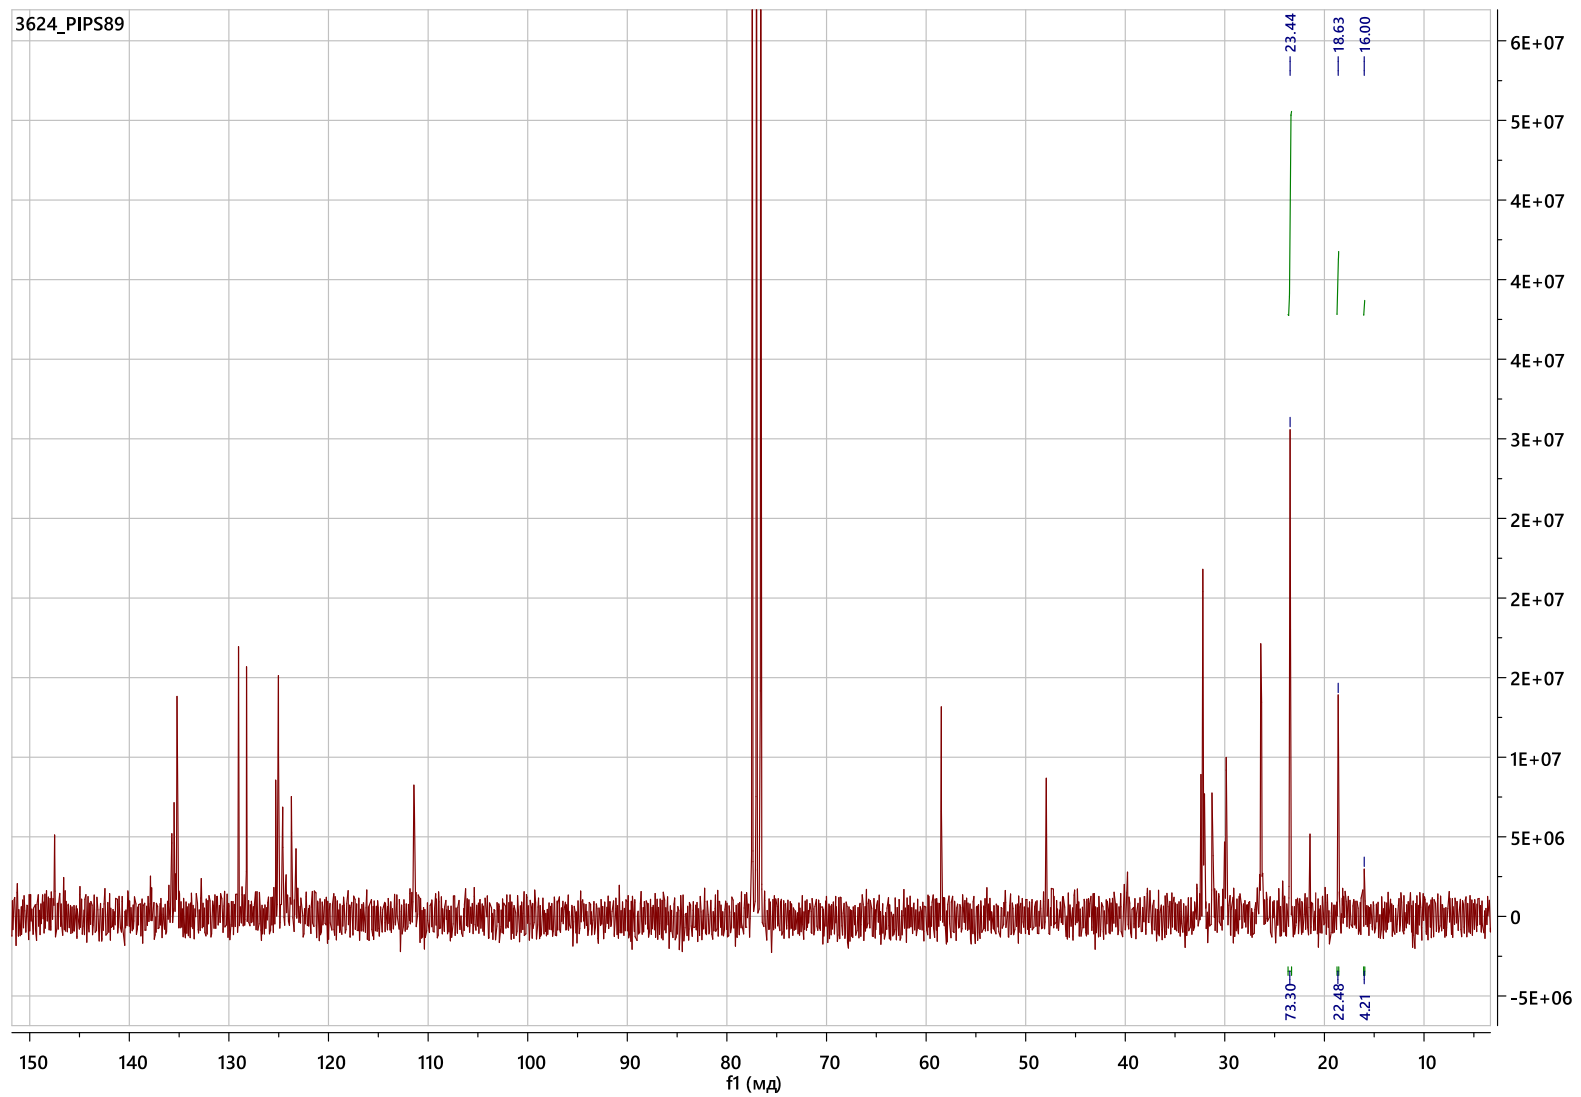

**Figure S 20.**  $^{13}\text{C}\{^1\text{H}\}$  NMR spectrum of PIP sample (Table 1, entry 5).

SEC Summary information

---

S 2300/S 2400

Processing Start Time (min) = 5,471

Processing Stop Time (min) = 8,600

Number of Slices = 188

Weight Average Molecular Weight = 8264602

Number Average Molecular Weight = 976555

Z Average Molecular Weight = 35667725

Z+1 Average Molecular Weight = 62126591

Polydispersity index = 8,463

Peak Molecular Weight = 3293592

Z Average / Weight Average = 4,316

Z+1 Average / Weight Average = 7,517

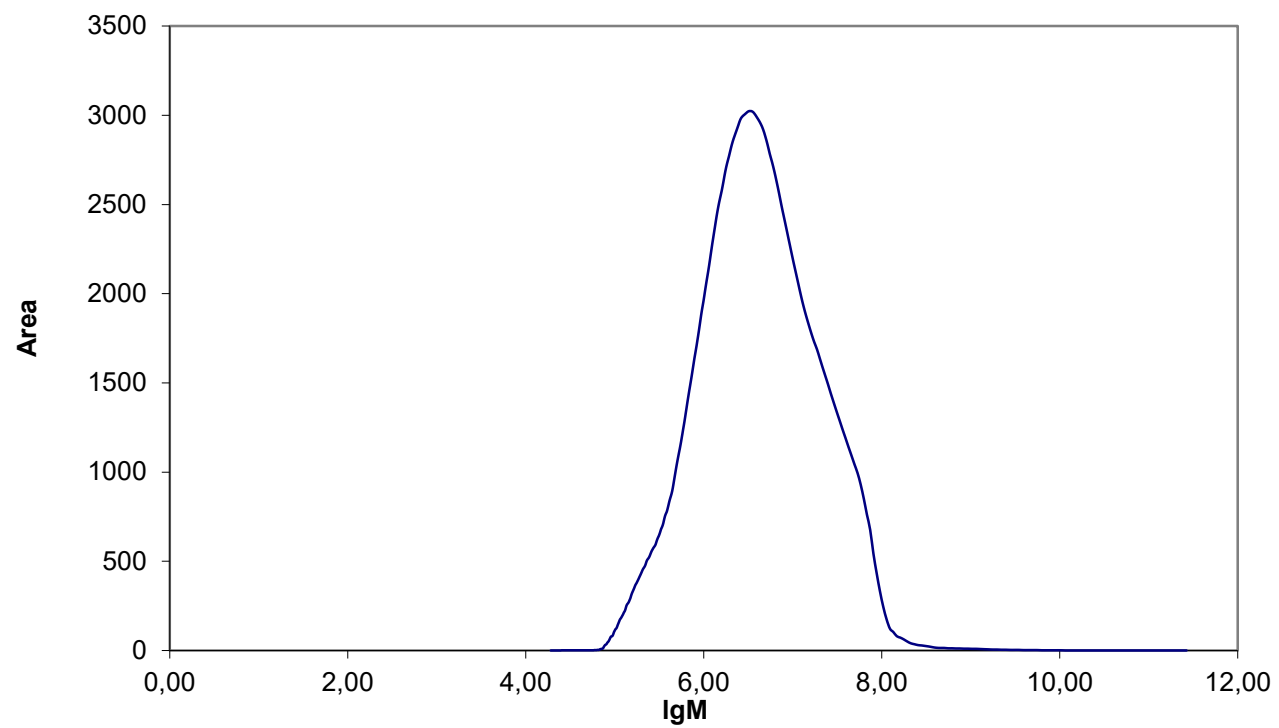

**Figure S 21.** GPC of PIP sample (Table 1, entry 7).

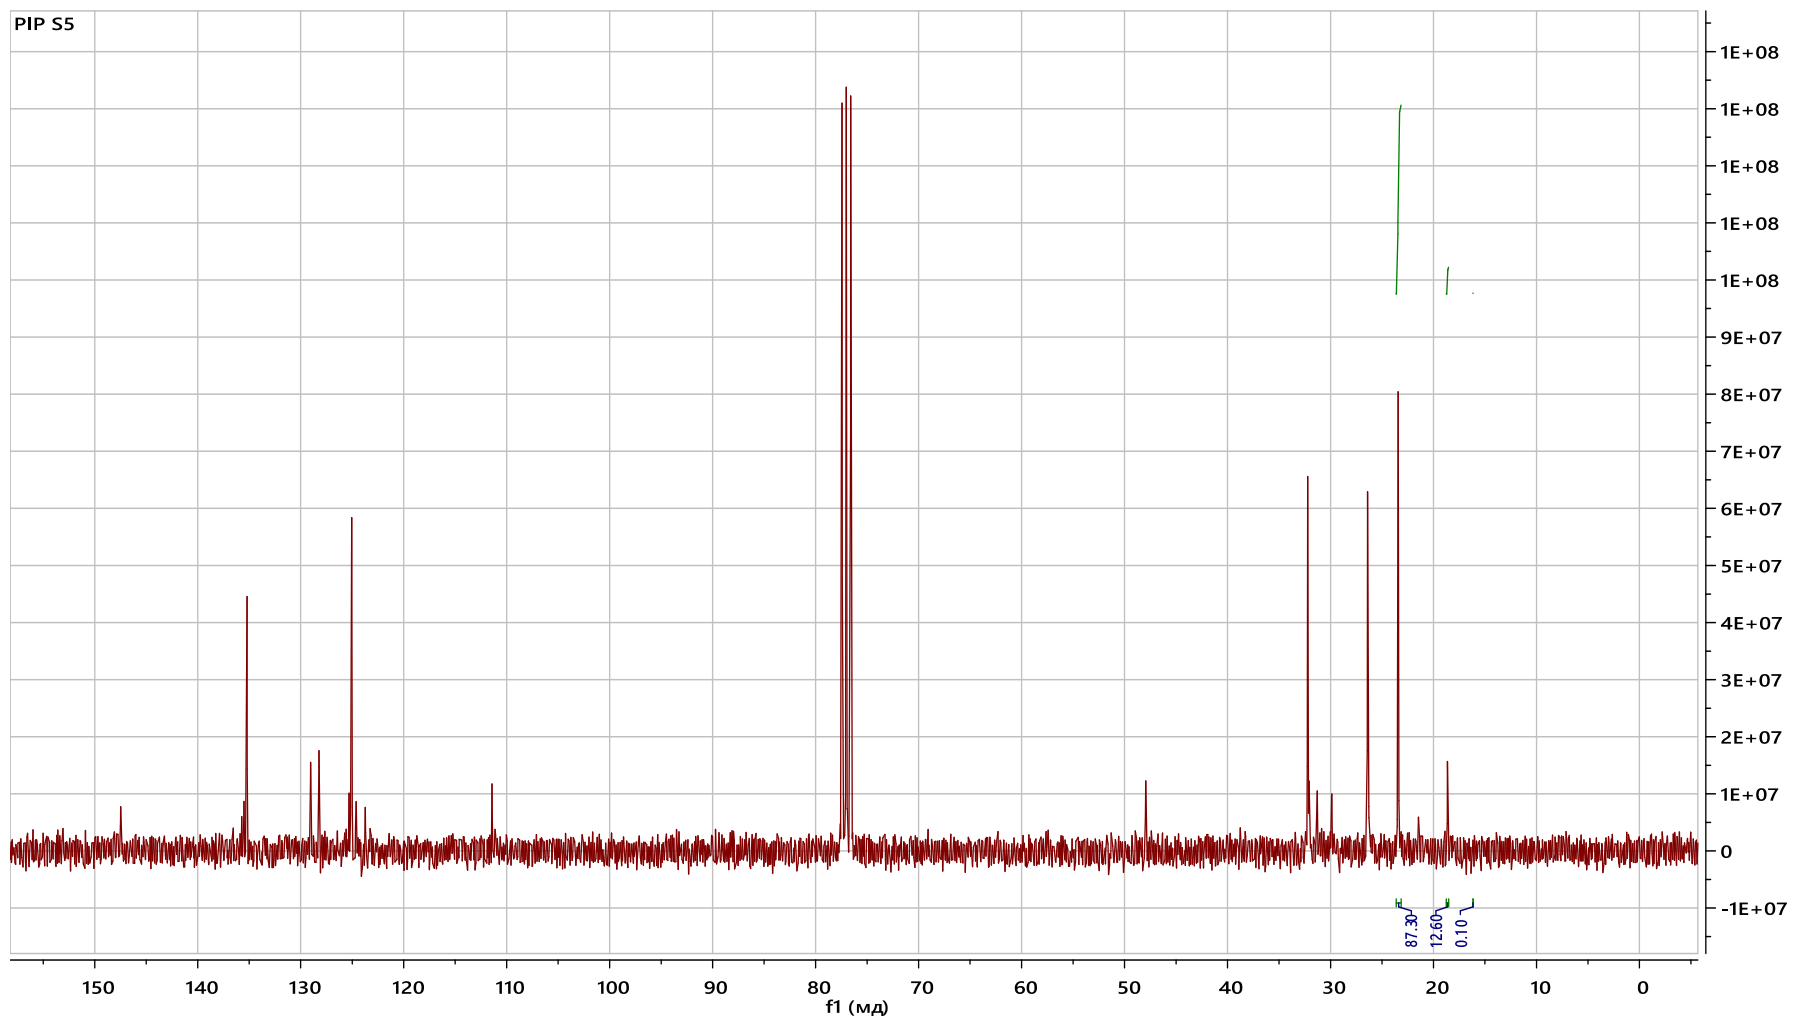

**Figure S 22.**  $^{13}\text{C}\{^1\text{H}\}$  NMR spectrum of PIP sample (Table 1, entry 7).

SEC Summary information

---

S 2300/S 2400

Processing Start Time (min) = 5,547

Processing Stop Time (min) = 9,058

Number of Slices = 211

Weight Average Molecular Weight = 7736664

Number Average Molecular Weight = 990610

Z Average Molecular Weight = 20115327

Z+1 Average Molecular Weight = 3131020

Polydispersity index = 7,810

Peak Molecular Weight = 3451922

Z Average / Weight Average = 2,600

Z+1 Average / Weight Average = 4,047

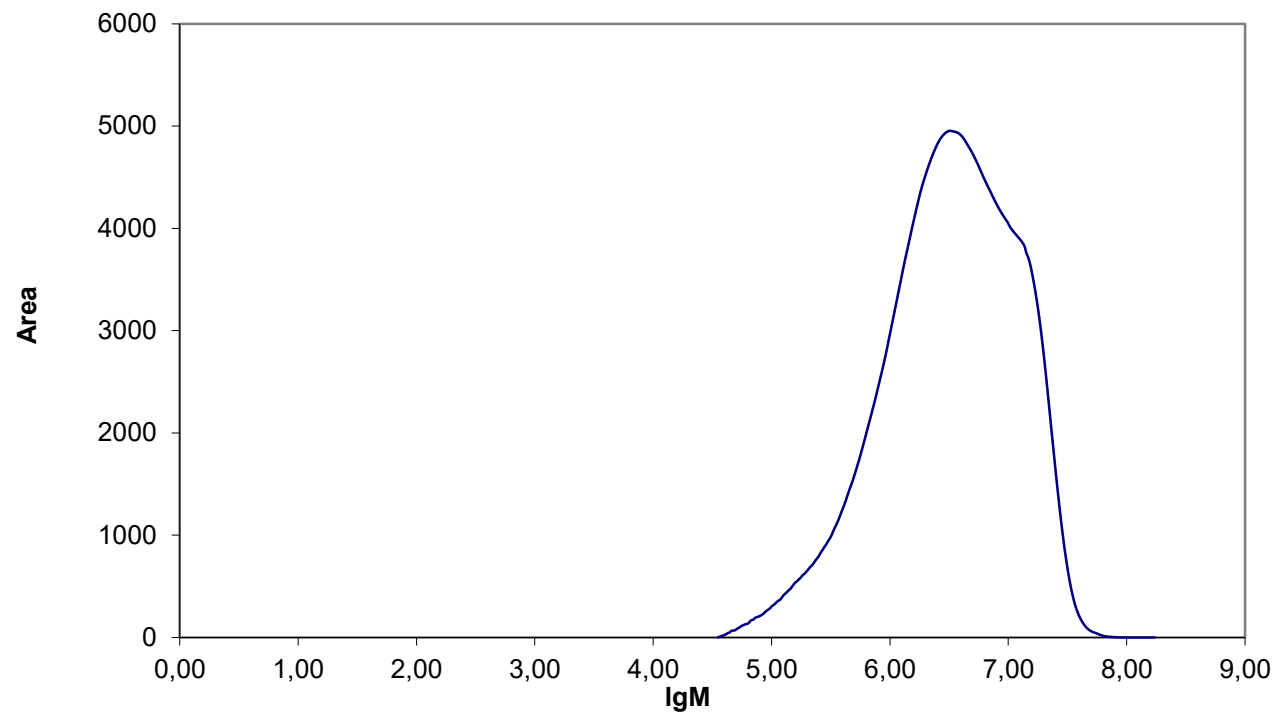

**Figure S 23.** GPC of PIP sample (Table 1, entry 8).



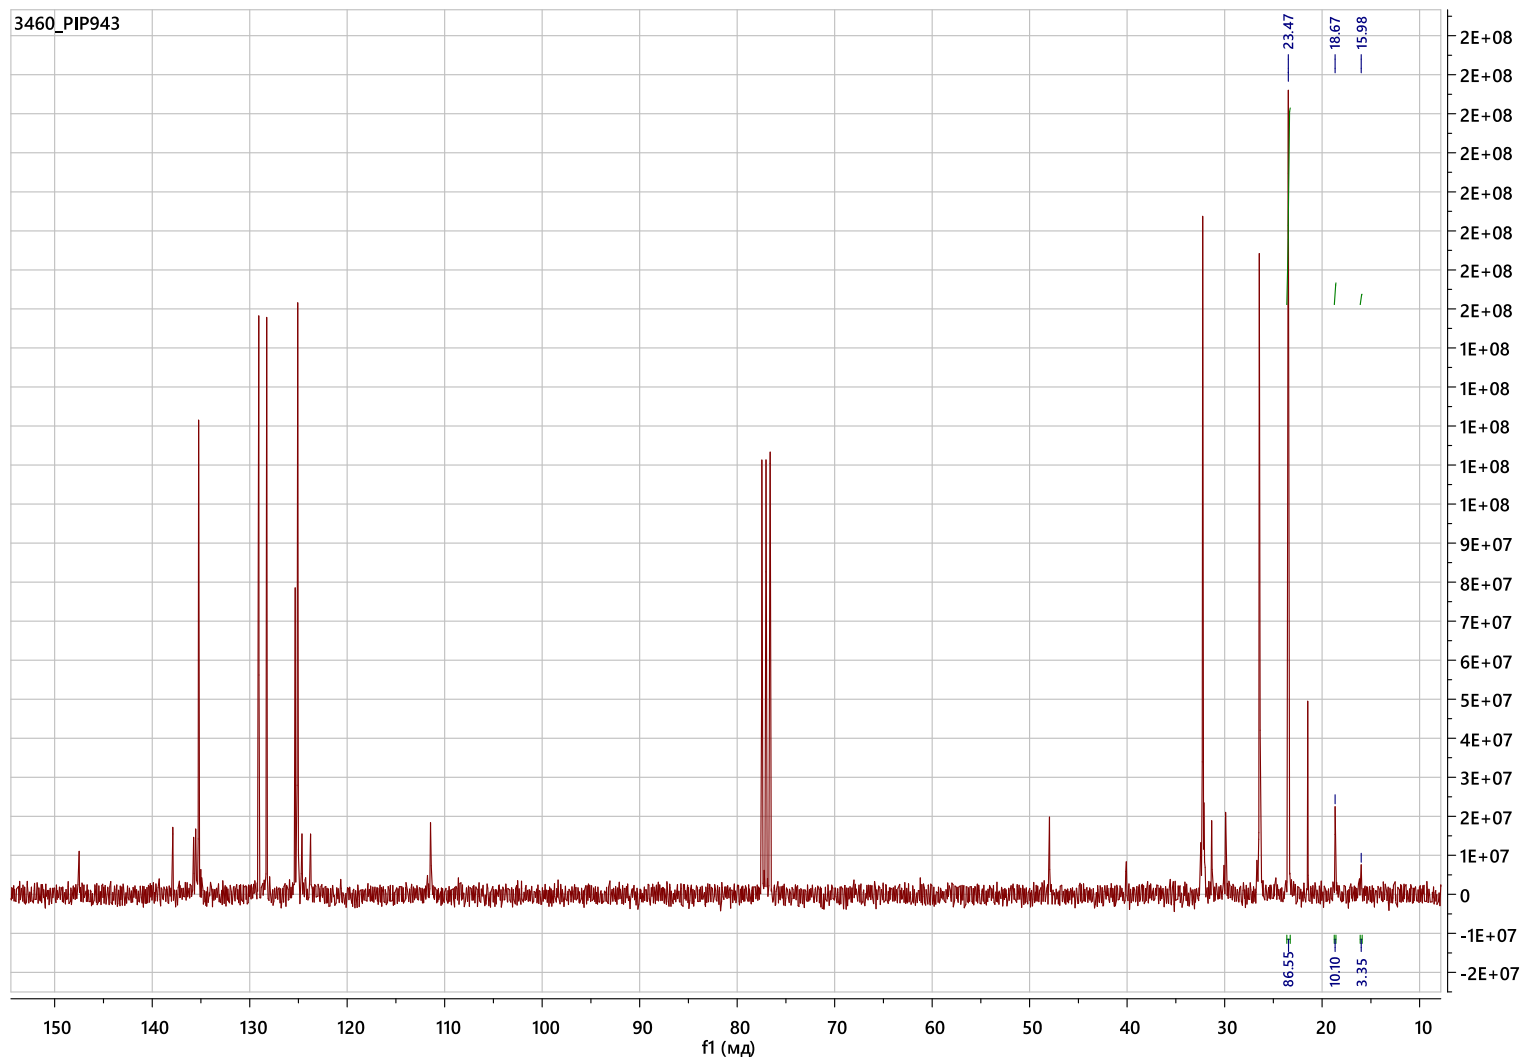

**Figure S 24.**  $^{13}\text{C}\{^1\text{H}\}$  NMR spectrum of PIP sample (Table 1, entry 8).

SEC Summary information

---

S 2300/S 2400

Processing Start Time (min) = 7,479

Processing Stop Time (min) = 11,385

Number of Slices = 234

Weight Average Molecular Weight = 23491

Number Average Molecular Weight = 6231

Z Average Molecular Weight = 42446

Z+1 Average Molecular Weight = 60975

Polydispersity index = 3,770

Peak Molecular Weight = 19589

Z Average / Weight Average = 1,807

Z+1 Average / Weight Average = 2,596

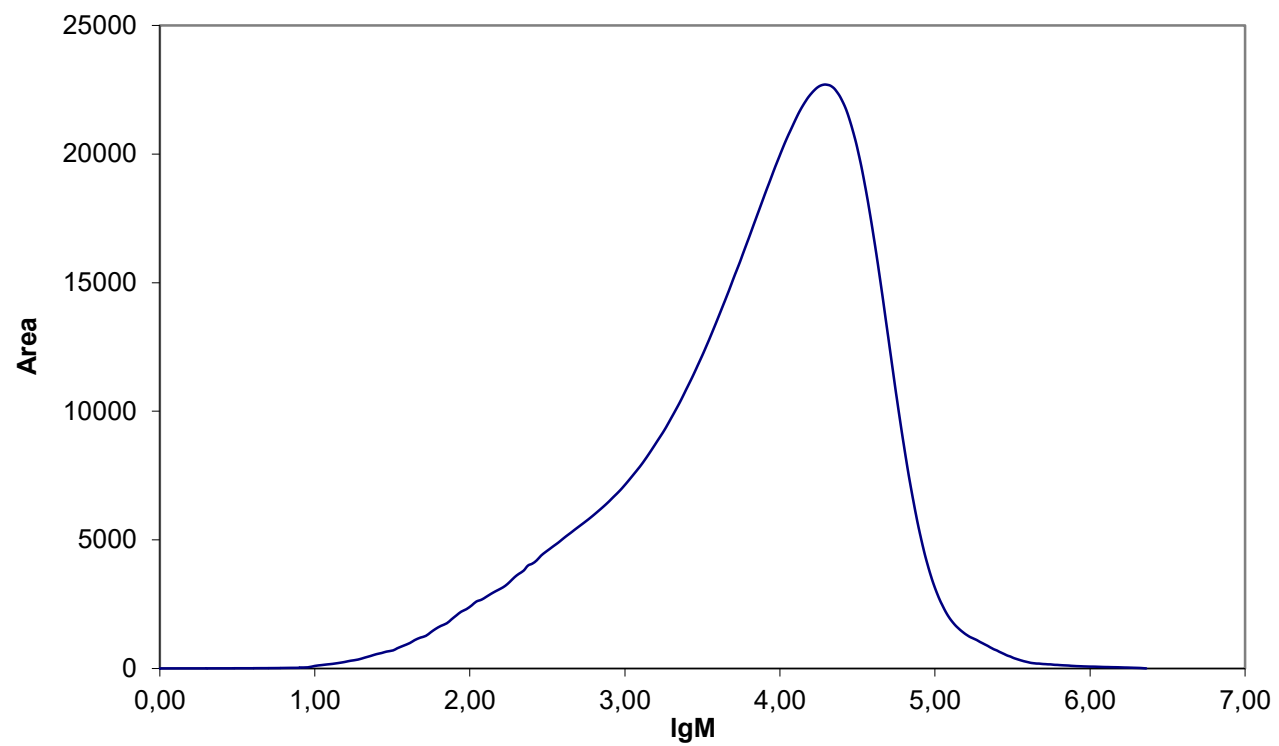

**Figure S 25.** GPC of PIP sample (Table 1, entry 10).

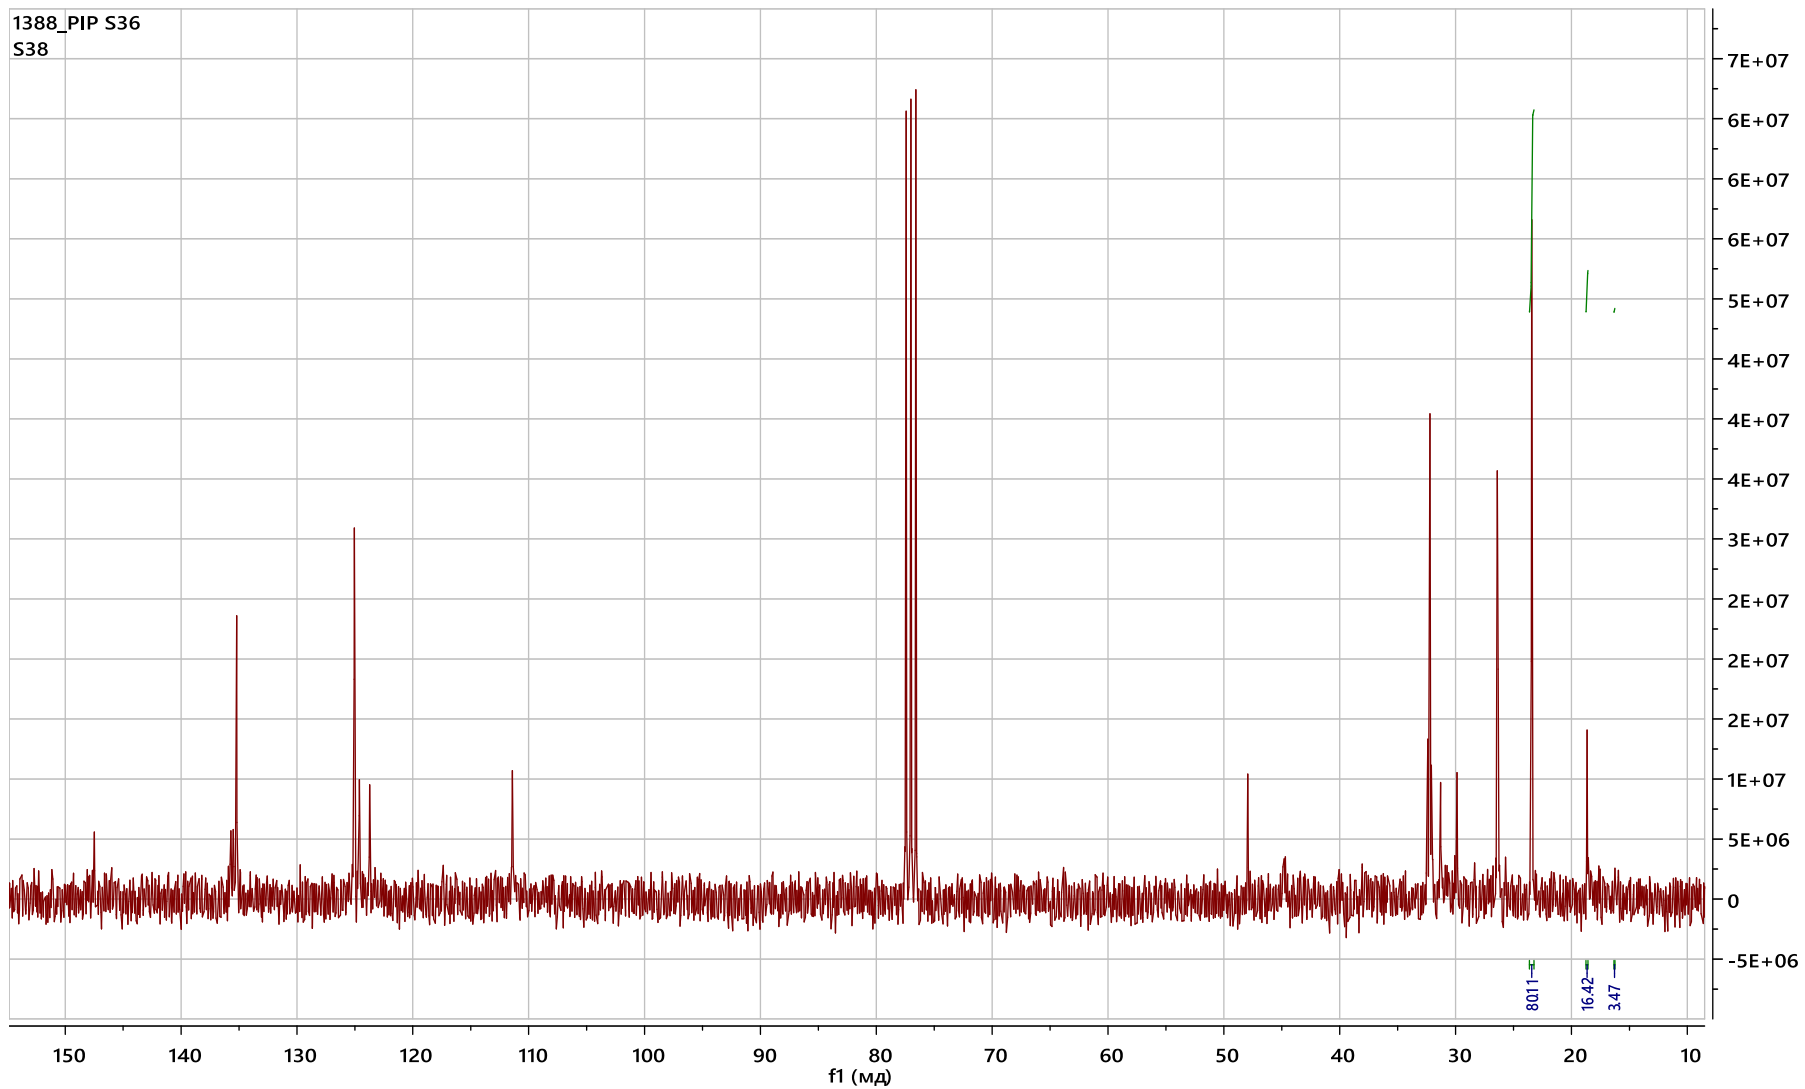

**Figure S 26.**  $^{13}\text{C}\{^1\text{H}\}$  NMR spectrum of PIP sample (Table 1, entry 10).

SEC Summary information

---

S 2300/S 2400

Processing Start Time (min) = 12,012

Processing Stop Time (min) = 15,099

Number of Slices = 185

Weight Average Molecular Weight = 9030

Number Average Molecular Weight = 5596

Z Average Molecular Weight = 12564

Z+1 Average Molecular Weight = 15905

Polydispersity index = 1,614

Peak Molecular Weight = 7507

Z Average / Weight Average = 1,391

Z+1 Average / Weight Average = 1,761

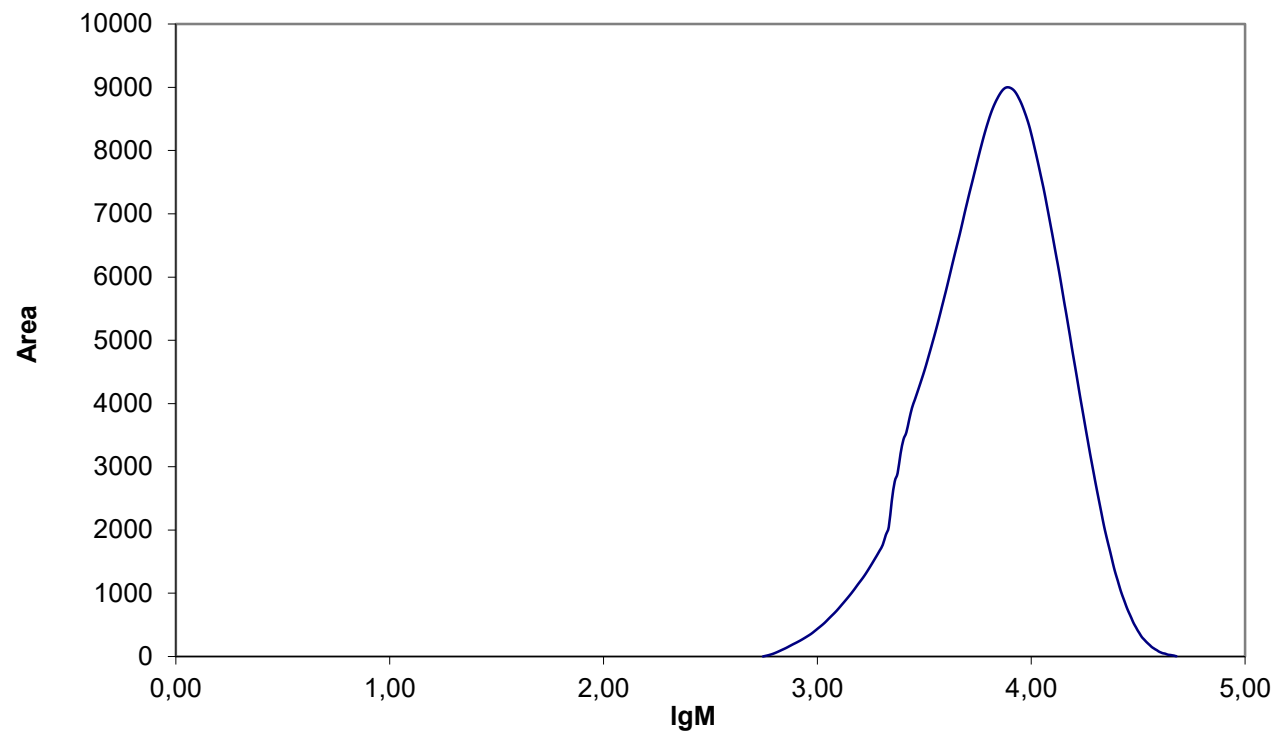

**Figure S 27.** GPC of PIP sample (Table 1, entry 11).

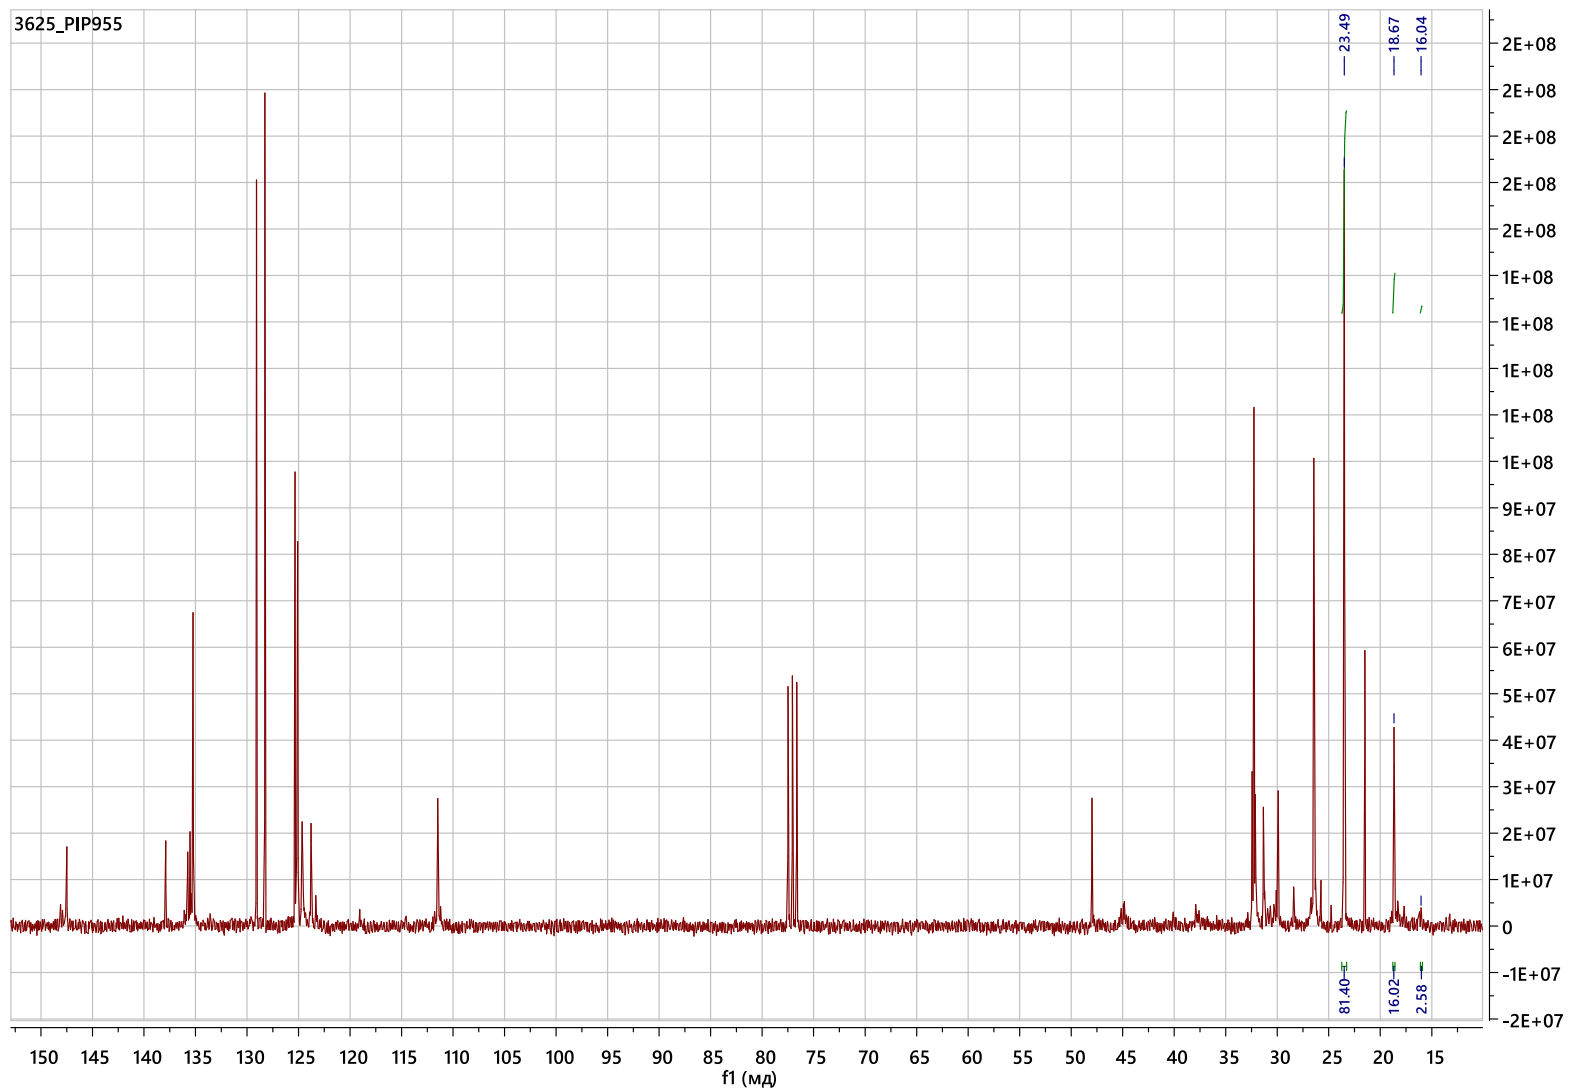

**Figure S 28.**  $^{13}\text{C}\{^1\text{H}\}$  NMR spectrum of PIP sample (Table 1, entry 11).

SEC Summary information

---

S 2300/S 2400

Processing Start Time (min) = 5,435

Processing Stop Time (min) = 8,301

Number of Slices = 172

Weight Average Molecular Weight = 3169399

Number Average Molecular Weight = 668809

Z Average Molecular Weight = 13965628

Z+1 Average Molecular Weight = 31120891

Polydispersity index = 4,739

Peak Molecular Weight = 1403981

Z Average / Weight Average = 4,406

Z+1 Average / Weight Average = 9,819



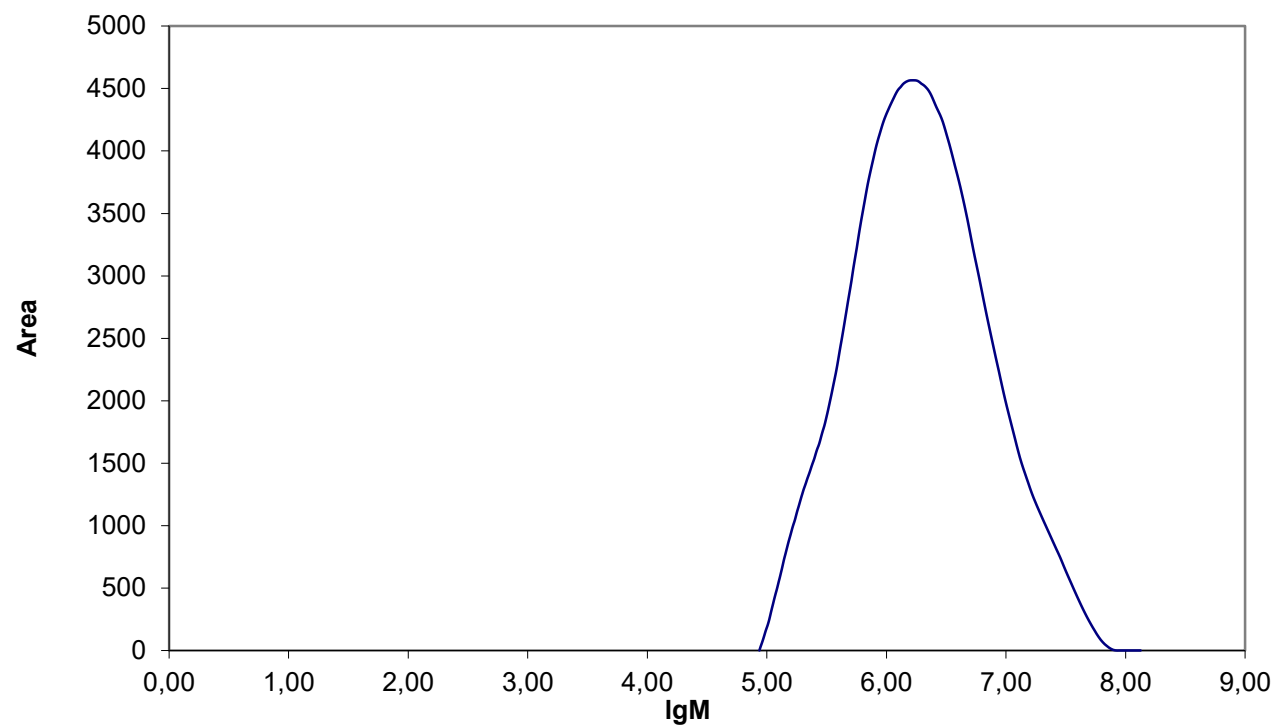

**Figure S 29.** GPC of PIP sample (Table 1, entry 15).

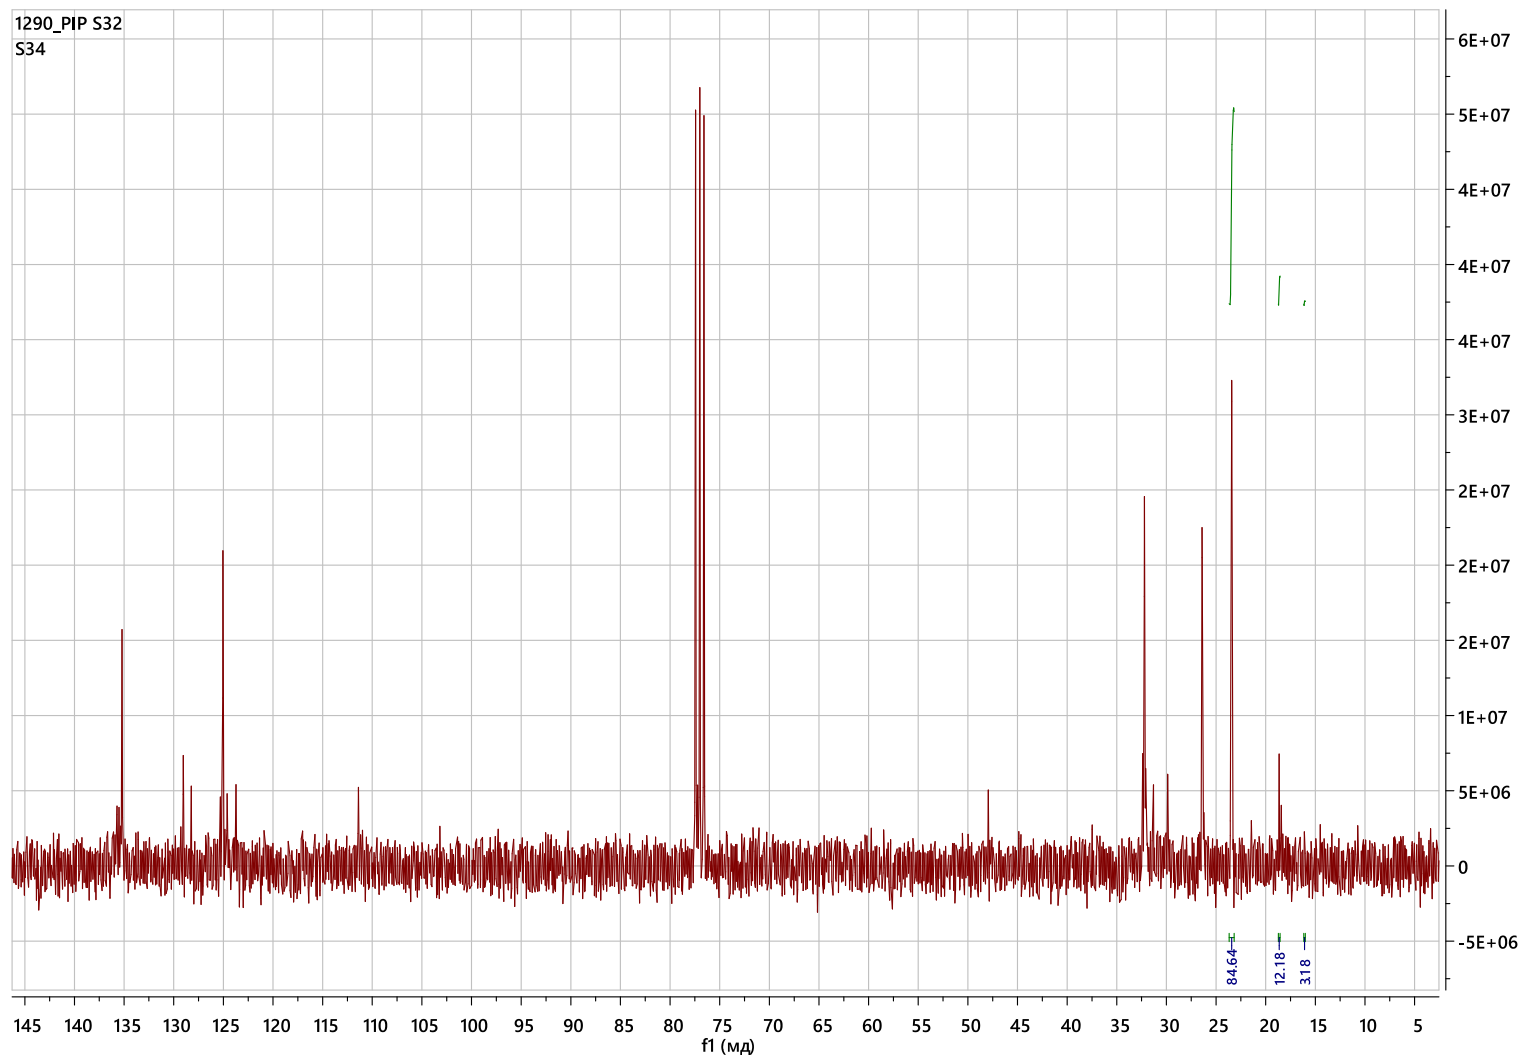

**Figure S 30.**  $^{13}\text{C}\{^1\text{H}\}$  NMR spectrum of PIP sample (Table 1, entry 15).

SEC Summary information

---

S 2300/S 2400

Processing Start Time (min) = 5,685

Processing Stop Time (min) = 8,182

Number of Slices = 150

Weight Average Molecular Weight = 1909911

Number Average Molecular Weight = 690318

Z Average Molecular Weight = 5114144

Z+1 Average Molecular Weight = 10492767

Polydispersity index = 2,767

Peak Molecular Weight = 1344801

Z Average / Weight Average = 2,678

Z+1 Average / Weight Average = 5,494

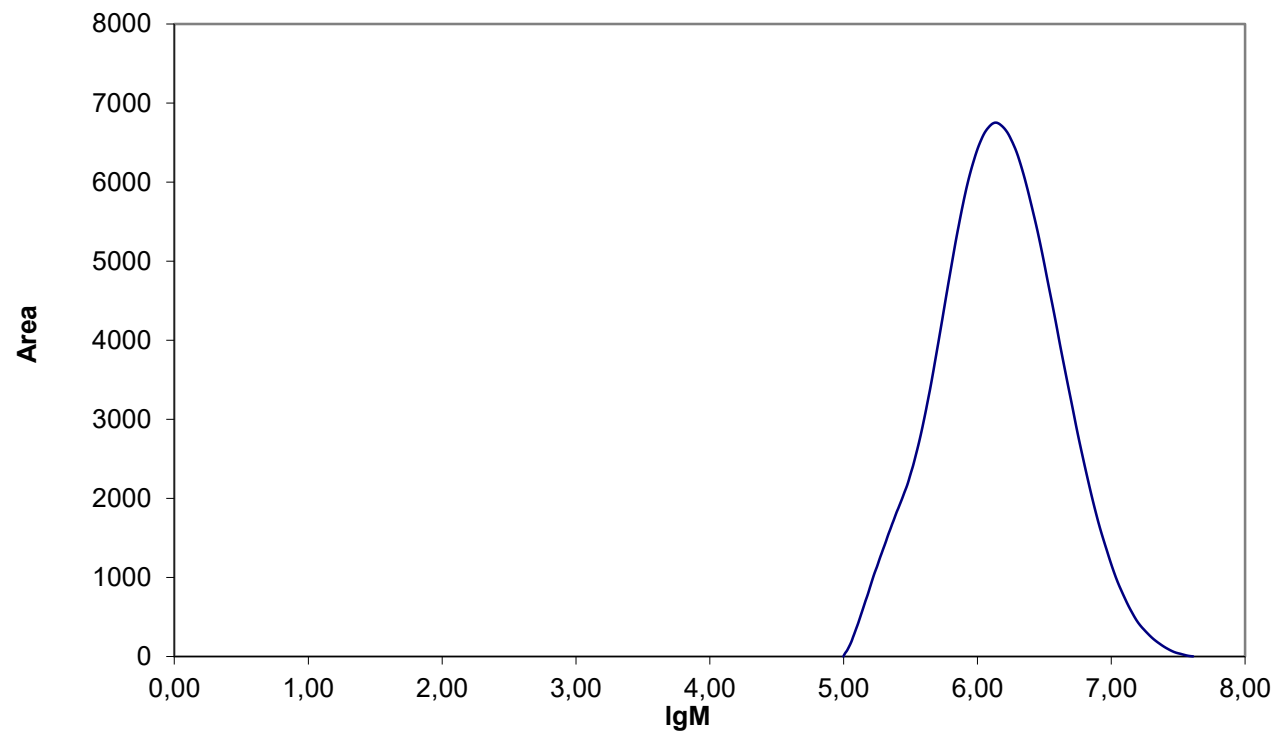

**Figure S 31.** GPC of PIP sample (Table 1, entry 16).

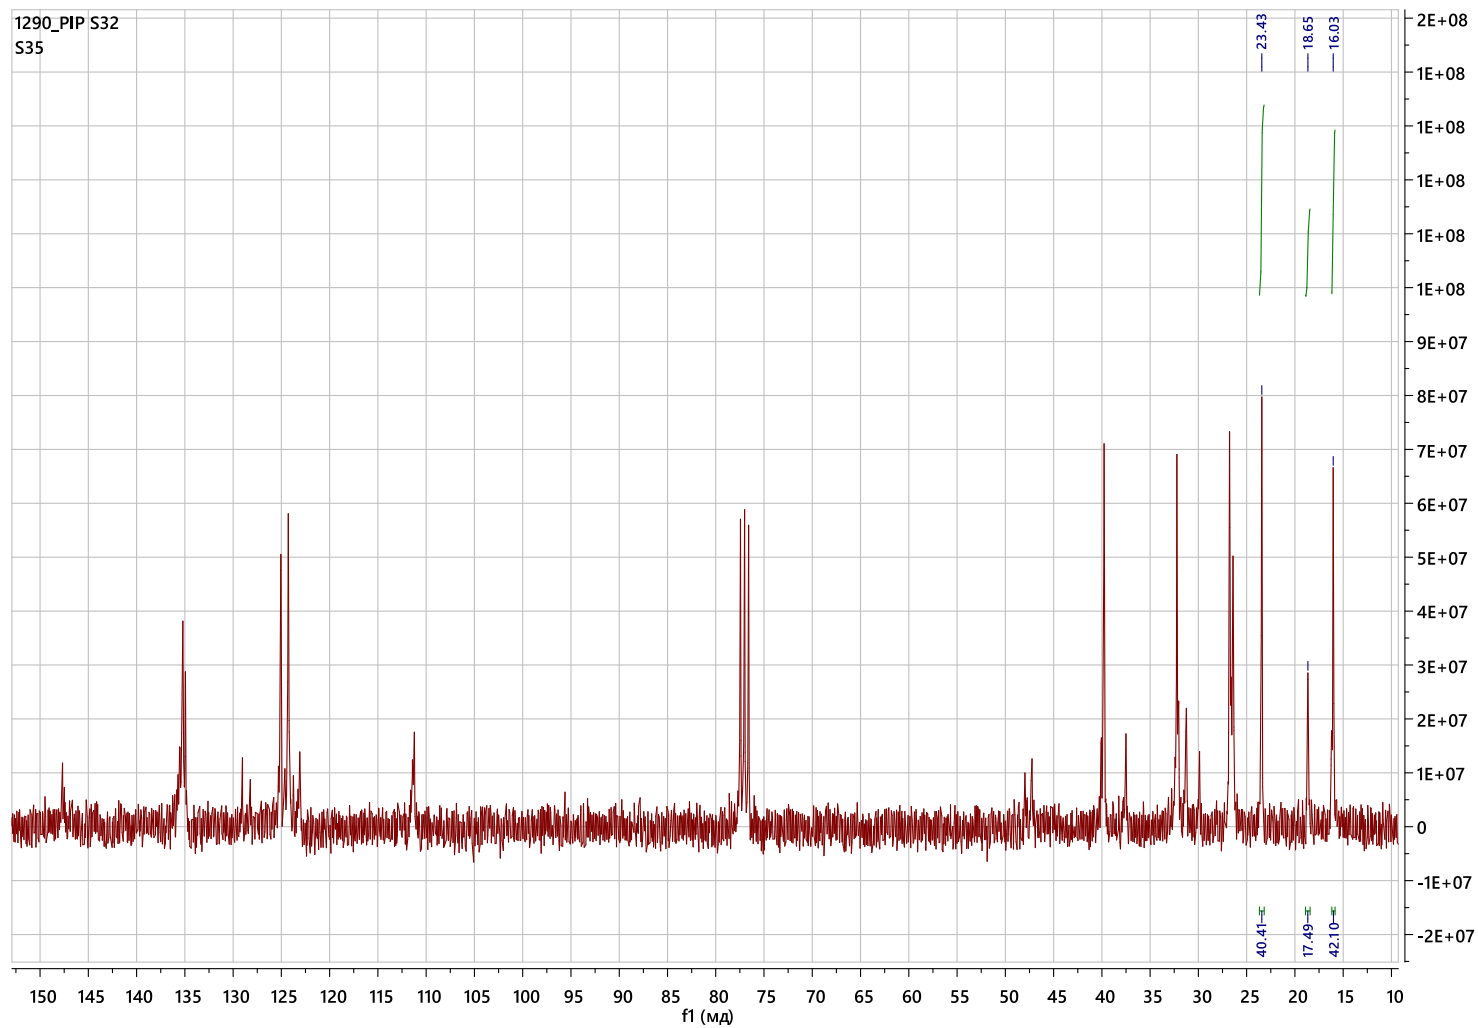

**Figure S 32.**  $^{13}\text{C}\{^1\text{H}\}$  NMR spectrum of PIP sample (Table 1, entry 16).

SEC Summary information

---

S 2300/S 2400

Processing Start Time (min) = 5,387

Processing Stop Time (min) = 8,863

Number of Slices = 209

Weight Average Molecular Weight = 2939503

Number Average Molecular Weight = 535126

Z Average Molecular Weight = 13569322

Z+1 Average Molecular Weight = 34839903

Polydispersity index = 5,493

Peak Molecular Weight = 1920848

Z Average / Weight Average = 4,616

Z+1 Average / Weight Average = 11,852

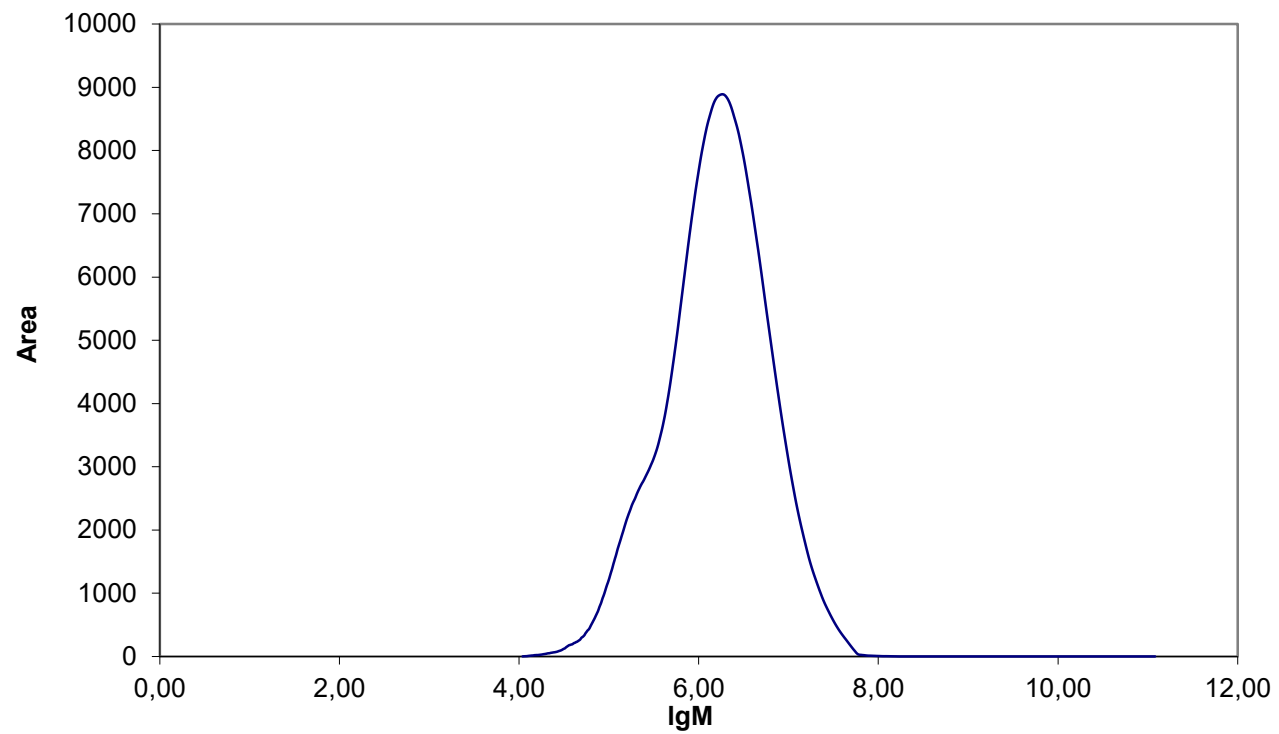

**Figure S 33.** GPC of PIP sample (Table 1, entry 17).

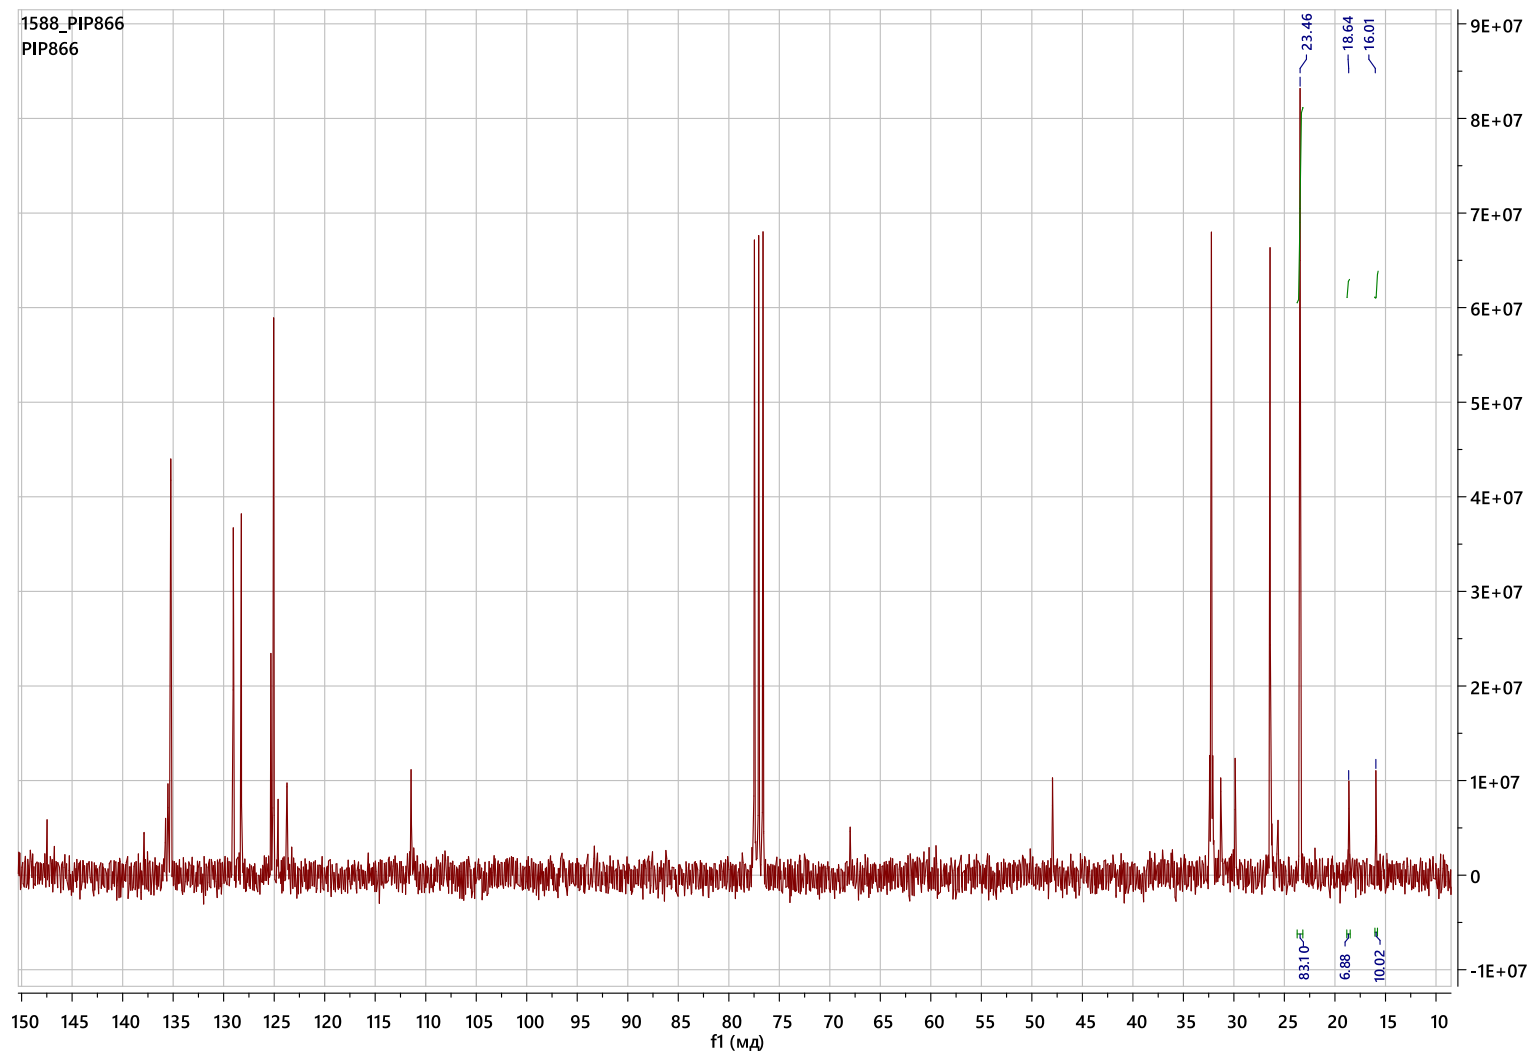

**Figure S 34.**  $^{13}\text{C}\{^1\text{H}\}$  NMR spectrum of PIP sample (Table 1, entry 17).



SEC Summary information

---

S 2300/S 2400

Processing Start Time (min) = 8,363

Processing Stop Time (min) = 10,704

Number of Slices = 141

Weight Average Molecular Weight = 24500

Number Average Molecular Weight = 11690

Z Average Molecular Weight = 35305

Z+1 Average Molecular Weight = 42916

Polydispersity index = 2,096

Peak Molecular Weight = 3230

Z Average / Weight Average = 1,441

Z+1 Average / Weight Average = 1,752

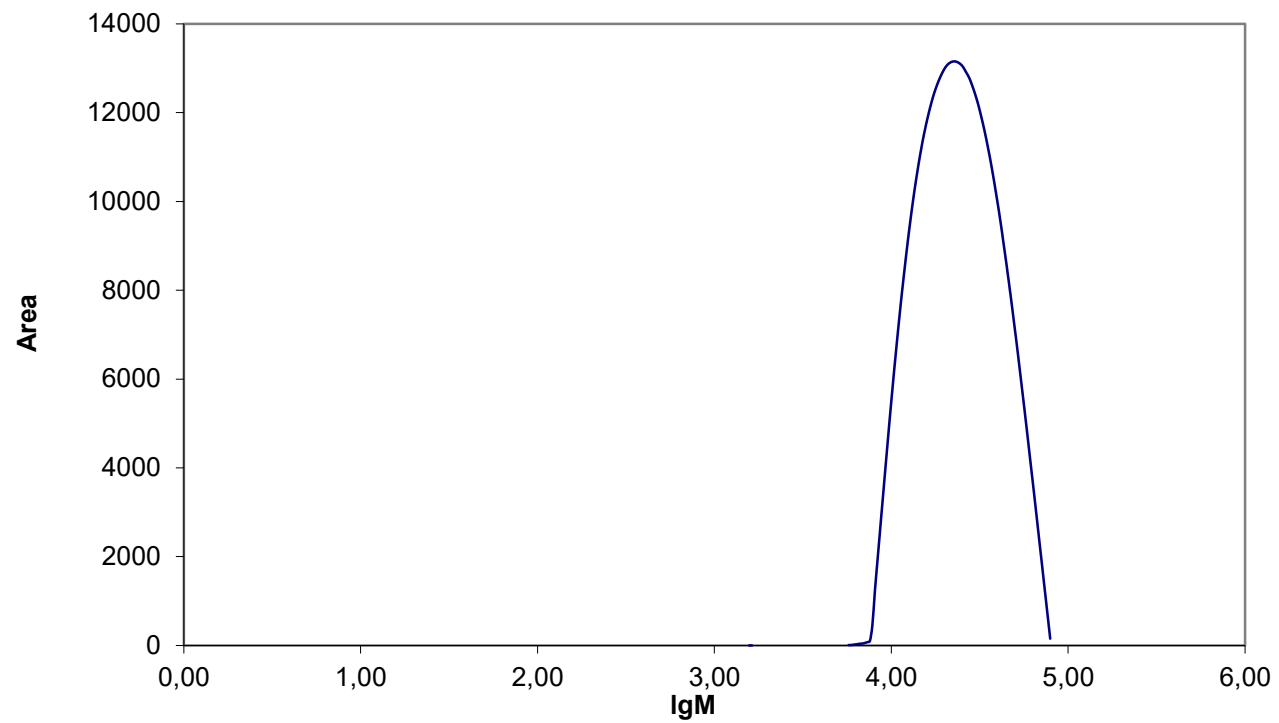

**Figure S 35.** GPC of polyheptene sample (Table 2, entry 2).

SEC Summary information

---

S 2300/S 2400

Processing Start Time(min) = 5,782

Processing Stop Time(min) = 9,986

Number of Slices = 252

Weight Average Molecular Weight = 720588

Number Average Molecular Weight = 156512

Z Average Molecular Weight = 2953846

Z+1 Average Molecular Weight = 6810021

Polydispersity index = 4,604

Peak Molecular Weight = 519817

Z Average / Weight Average = 4,099

Z+1 Average / Weight Average = 9,451

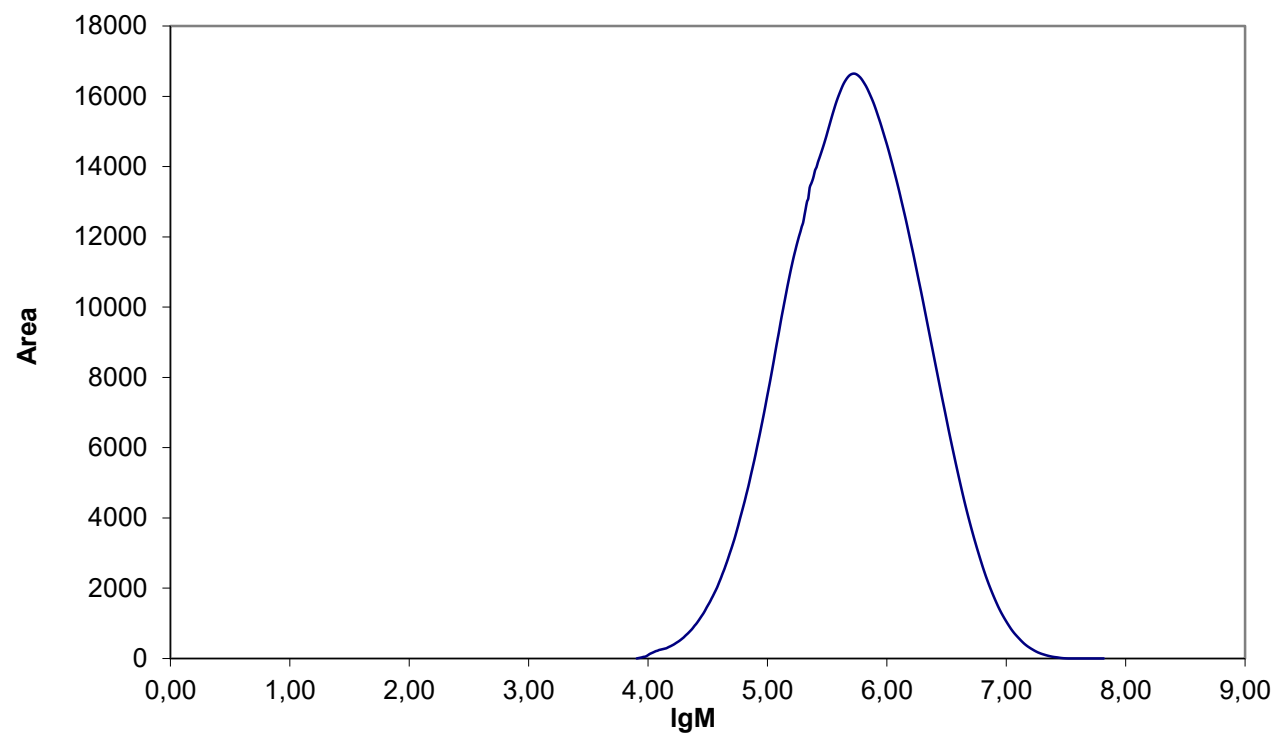

**Figure S 36.** GPC of polyheptene sample (Table 2, entry 3).

S 2300/S 2400

Processing Start Time (min) = 5,698

Processing Stop Time (min) = 9,616

Number of Slices = 235

Weight Average Molecular Weight = 737535

Number Average Molecular Weight = 190201

Z Average Molecular Weight = 2636200

Z+1 Average Molecular Weight = 7636250

Polydispersity index = 3,878

Peak Molecular Weight = 617365

Z Average / Weight Average = 3,574

Z+1 Average / Weight Average = 10,354

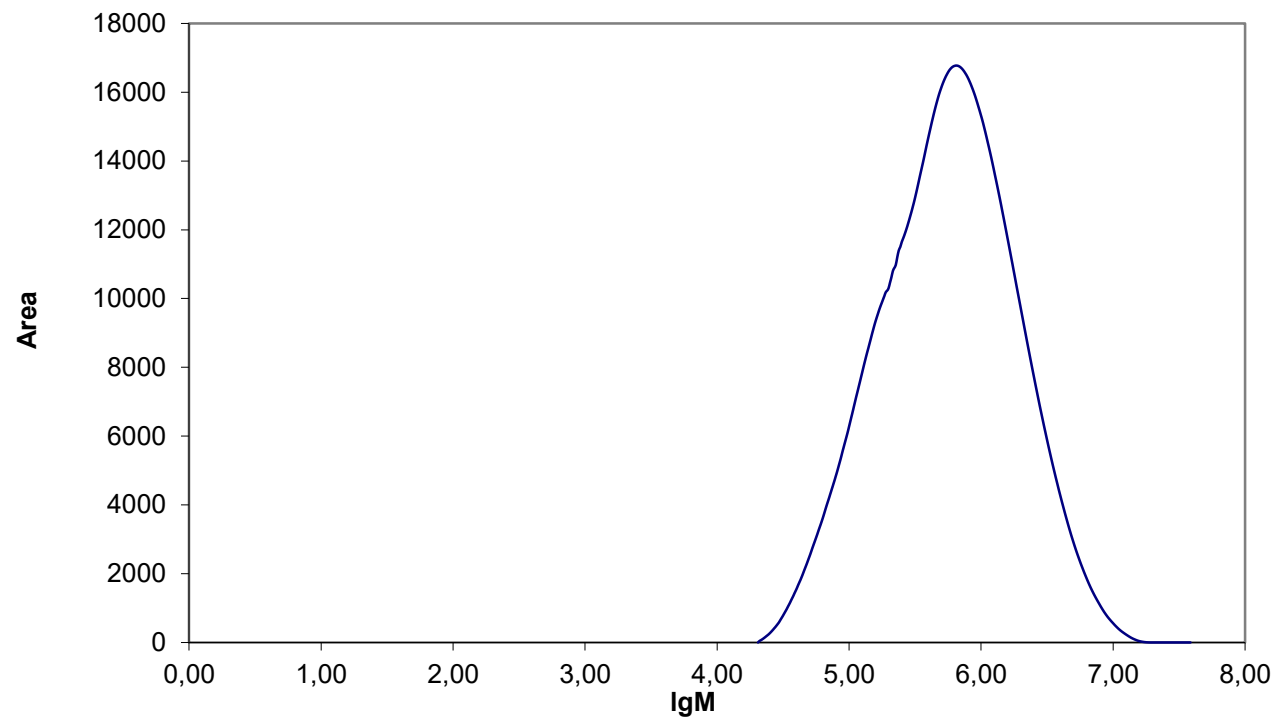

**Figure S 37.** GPC of polyheptene sample (Table 2, entry 4).

S 2300/S 2400

Processing Start Time (min) = 10,727

Processing Stop Time (min) = 12,293

Number of Slices = 94

Weight Average Molecular Weight = 2693

Number Average Molecular Weight = 1736

Z Average Molecular Weight = 4732

Z+1 Average Molecular Weight = 7131

Polydispersity index = 1,551

Peak Molecular Weight = 1486

Z Average / Weight Average = 1,757

Z+1 Average / Weight Average = 2,648

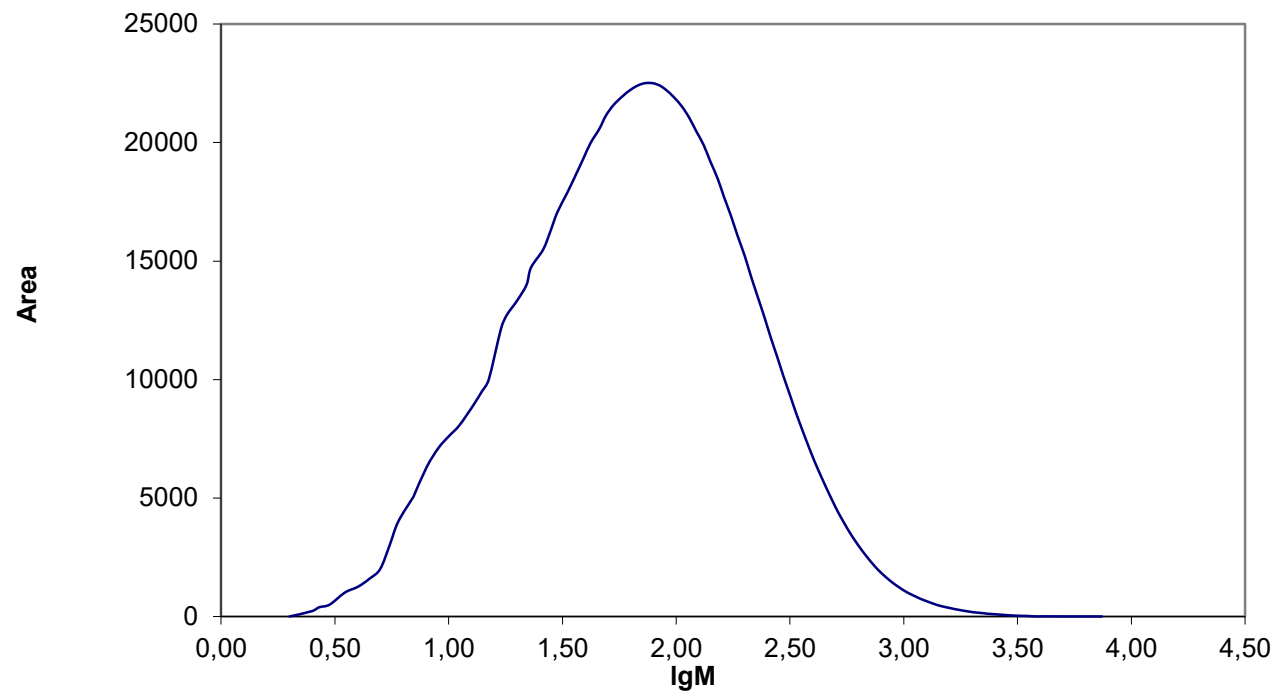

**Figure S 38.** GPC of polyheptene sample (Table 2, entry 6).



SEC Summary information

---

S 2300/S 2400

|                                   |        |
|-----------------------------------|--------|
| Processing Start Time(min) =      | 9,128  |
| Processing Stop Time(min) =       | 12,487 |
| Number of Slices =                | 202    |
| Weight Average Molecular Weight = | 8485   |
| Number Average Molecular Weight = | 3705   |
| Z Average Molecular Weight =      | 16067  |
| Z+1 Average Molecular Weight =    | 25478  |
| Polydispersity index =            | 2,290  |
| Peak Molecular Weight =           | 4406   |
| Z Average / Weight Average =      | 1,893  |
| Z+1 Average / Weight Average =    | 3,003  |

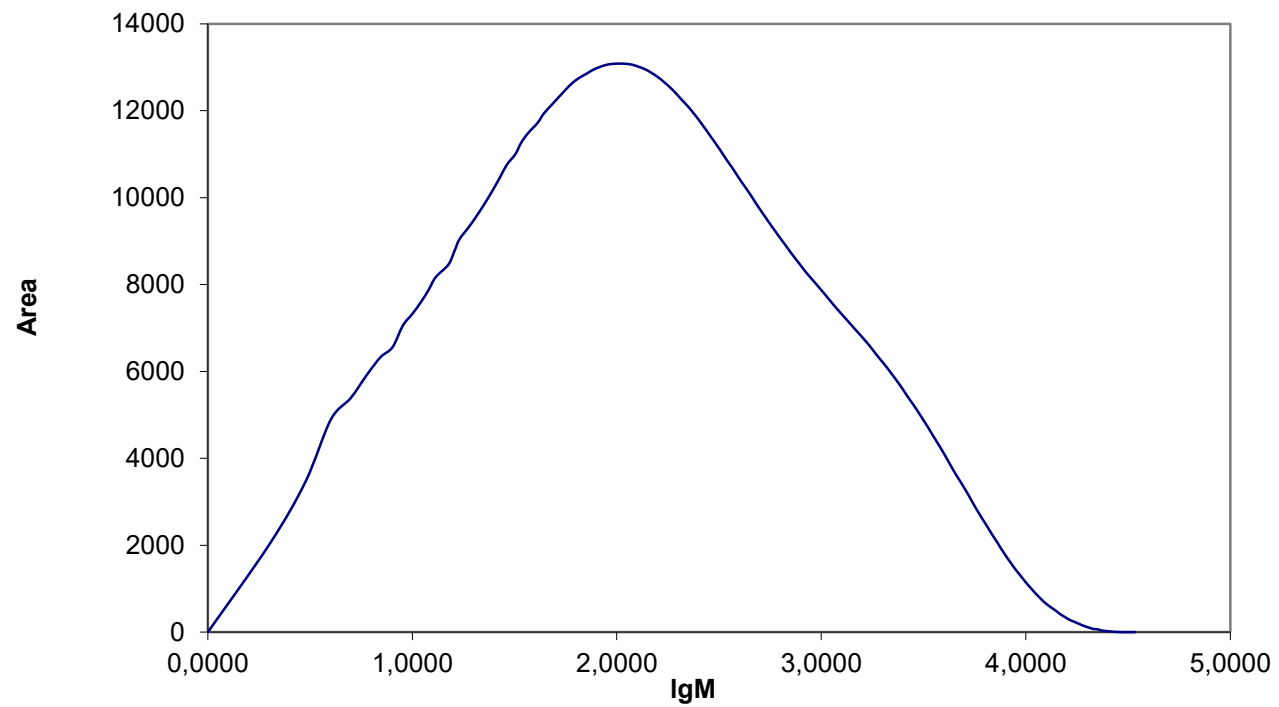

**Figure S 39.** GPC of polyheptene sample (Table 2, entry 8).
